1

2 Transcriptomic analysis of developing seeds in a wheat  
3 mutant RSD32 with reduced seed dormancy

4 Short title: Transcriptomic analysis of developing seeds in a wheat mutant RSD32

5

6 Kazuhide Rikiishi\*, Manabu Sugimoto, Masahiko Maekawa

7

8 Institute of Plant Science and Resources, Okayama University, Kurashiki, Okayama, Japan

9

10 \*Corresponding author

11 E-mail: [riki@rib.okayama-u.ac.jp](mailto:riki@rib.okayama-u.ac.jp) (KR)

12

13

14

15

16

17

18

## 19 **Abstract**

20           Seed dormancy, a major factor regulating pre-harvest sprouting, can severely hinder wheat  
21 cultivation. Abscisic acid biosynthesis and sensitivity play important roles in the regulation of seed  
22 dormancy. Reduced Seed Dormancy 32 (RSD32), a wheat mutant with reduced seed dormancy, is  
23 derived from the pre-harvest sprouting tolerant cultivar, Norin61. RSD32 is regulated by a single  
24 recessive gene and mutant phenotype expressed in a seed-specific manner. Results of this study  
25 show that Norin61 has a low germination index (GI) of whole seeds at 50 days after pollination  
26 (DAP) and earlier developmental stages. In RSD32, higher GI of whole seeds was found on DAP40.  
27 Dormancy was released by DAP50. Gene expressions in embryos of Norin61 and RSD32 were  
28 compared using RNA-seq analysis at the different developmental stages of DAP20, DAP30, and  
29 DAP40. Numbers of up-regulated gene in RSD32 are similar in all developmental stages. However,  
30 down-regulated genes in RSD32 are more numerous on DAP20 and DAP30 than on DAP40.  
31 Homologous genes related to circadian clock regulation and Ca<sup>2+</sup> signaling pathway, which have  
32 fundamental functions for plant growth and development, are involved in down-regulated genes in  
33 RSD32 on DAP20. For central components affecting the circadian clock, genes homologous to  
34 *CIRCADIAN CLOCK ASSOCIATED 1 (CCA1)* and *LATE ELONGATED HYPOCOTYL (LHY)*,  
35 which act as morning expressed genes, are expressed at lower levels in RSD32. However, higher  
36 expressions of *TIMING OF CAB EXPRESSION 1 (TOC1)* and *PHYTOCLOCK 1* homologues,

37 acting as evening expressed genes, are observed in RSD32. Homologues of Ca<sup>2+</sup> signaling pathway  
38 related genes are found to be specifically expressed on DAP20 in Norin61. Lower expression is  
39 shown in RSD32. These results suggest that RSD32 mutation expresses on DAP20 and earlier seed  
40 developmental stages and suggest that circadian clock regulation and Ca<sup>2+</sup> signaling pathway are  
41 involved in regulating wheat seed dormancy.

42

## 43 **Introduction**

44 Wheat, similarly to rice and maize, is a major crop worldwide and is important for world food  
45 supplies. Pre-harvest sprouting, which is triggered by continuous rainfall during seed development,  
46 is seed germination on mother plants. This germination decreases seed quality and causes extensive  
47 economic damage to cultivation efforts. Seed dormancy is a major regulation factor affecting pre-  
48 harvest sprouting. Seed dormancy inhibits germination of seeds under favorable conditions (e.g.  
49 temperature and moisture). Nevertheless, it occurs after seed maturation has been completed [1].  
50 Therefore, enhancing seed dormancy is an important breeding objective for avoiding pre-harvest  
51 sprouting damage.

52 Seed dormancy is induced and developed during seed maturation. Embryo development is  
53 completed at the early developmental stage (around 15 days after pollination: DAP15) in wheat [2].  
54 Endosperms develop at the middle stage (DAP15–DAP30). The seed fresh weight reaches its

55 maximum. Seeds reveal soft dough. At the late developmental stage (DAP30–DAP50), seed  
56 moisture contents decrease. Endosperms reach the hard dough stage. Seeds desiccate and change  
57 color from yellow to brown. Seed dormancy develops during seed desiccation in the late  
58 developmental stage.

59 A phytohormone, abscisic acid (ABA), plays an important role in the control of seed  
60 dormancy. In *Arabidopsis*, many mutants related to seed dormancy have been isolated. Earlier  
61 studies have indicated that ABA biosynthesis, catabolism, and sensitivity are involved in regulating  
62 seed dormancy [3–9]. *DELAY OF GERMINATION 1 (DOG1)* has been identified as a quantitative  
63 trait locus (QTL) controlling the natural variation of seed dormancy in *Arabidopsis* [10]. In fact,  
64 *DOG1* interacts with ABA signaling pathway through type 2C protein phosphatases *ABA-*  
65 *HYPERSENSITIVE GERMINATION 1 (AHG1)* and *AHG2* [11, 12]. Seed maturation regulators  
66 *LEAFY COTYLEDON 1 (LEC1)*, *LEC2*, *FUSCA3 (FUS3)* and *ABA INSENSITIVE 3 (ABI3)* are also  
67 involved in the regulation of seed dormancy [13–19]. These genes express at the early to late  
68 developmental stages of seed in *Arabidopsis*. In monocot species, *MOTHER OF FT AND TFL1*  
69 (*MFT*) and *MAP KINASE KINASE* in wheat [20, 21], *SDR4* in rice [22], and *ALANINE*  
70 *AMINOTRANSFERASE (AlaAT)* in barley [23] have been identified as QTLs regulating seed  
71 dormancy. Rikiishi et al. [24] reported that *TaABFI* related with ABA signaling pathway regulates  
72 the varietal variation of seed dormancy in wheat cultivars. Several genes regulating seed dormancy

73 have been identified in wheat as well. These genes express at the late seed developmental stage.  
74 However, wheat genes homologous to *DOG1* and seed maturation regulators are expressed at the  
75 early to middle seed development stage [25]. The appropriate time for expression differs depending  
76 on the regulator gene. These results indicate that different regulatory systems function at each  
77 developmental stage for seed dormancy regulation.

78 Reports of the literature describe that ABA signaling is connected with and integrated with  
79 other signaling pathways. Calcium ion acts as a second messenger. In fact, calcium signals are  
80 involved in several stress responses to cold, drought, salinity and light in plants [26, 27]. The  $\text{Ca}^{2+}$   
81 signaling pathway is initiated with the acceptance of  $\text{Ca}^{2+}$  signals by sensor proteins. Plant  $\text{Ca}^{2+}$   
82 sensors belong to three families [29–30]. Calmodulins (CaMs) and CaM-like proteins (CMLs) are  
83 grouped in the same family. The second family is calcineurin B-like proteins (CBLs) that  
84 specifically activate CBL-interacting protein kinases (CIPKs). The third family is  $\text{Ca}^{2+}$ -dependent  
85 protein kinases (CDPKs), which have a kinase domain and a  $\text{Ca}^{2+}$  sensor domain. Sensor proteins  
86 accepting  $\text{Ca}^{2+}$  signals are decoded to downstream responses. Because  $\text{Ca}^{2+}$  sensor proteins affect  
87 ABA sensitivity,  $\text{Ca}^{2+}$  signaling cooperatively regulates the response to stresses with the ABA  
88 signaling pathway [31–36]. Several reports have described the functions of circadian-clock-related  
89 genes on ABA sensitivity and dormancy release [37–41]. Circadian clock regulates the gene  
90 expressions and physiological responses corresponding to a daily cycle of light and darkness. In

91 *Arabidopsis*, *LATE ELONGATED HYPOCOTYL (LHY)*, *CIRCADIAN CLOCK ASSOCIATED 1*  
92 *(CCA1)*, *TIMING OF CAB EXPRESSION 1/ PSEUDO-RESPONSE REGULATOR (TOC1/PRR)*,  
93 *EARLY FLOWERING (ELF)* and *LUX ARRHYTHMO (LUX)* are involved in the central cores of the  
94 circadian clock [38]. These genes encode transcription factors or proteins forming complexes with  
95 transcription factor and construct a complex system with feedback loop regulation. Circadian rhythm  
96 is oscillated by the interactions between the morning expressed *LHY* and *CCA1* and the evening  
97 expressed *TOC1*. Circadian clock components interact with various transcription factors such as  
98 *NIGHT LIGHT-INDUCIBLE AND CLOCK-REGULATED 1 (LNKI)*, *FAR-RED IMPAIRED*  
99 *RESPONSE 1 (FAR1)*, *PHYTOCHROME INTERACTING FACTORS (PIFs)*, *REVEILLES (RVEs)*,  
100 and *CONSTANS-LIKE* [42–46]. Furthermore, circadian clock genes regulate cytosolic Ca<sup>2+</sup> influx  
101 and the signaling pathways of ABA and Ca<sup>2+</sup>, suggesting that integrating regulatory network is  
102 necessary for circadian clock related fundamental processes in plant growth and development [47–  
103 50].

104 Rikiishi and Maekawa [51] produced a mutant with reduced seed dormancy from Norin61, a  
105 pre-harvest sprouting tolerant cultivar. Reduced Seed Dormancy 32 (RSD32) was found to be a  
106 seed-specific and single recessive mutation. Expressions of several transcription factors related with  
107 the regulation of seed dormancy were decreased in embryos of RSD32, suggesting that RSD32 is an  
108 important factor for the regulation of seed dormancy in wheat.

109 For the present study, gene expressions in embryos of Norin61 and RSD32 were investigated  
110 using RNA-seq analysis. Expression profiles were compared at three developmental stages: DAP20,  
111 DAP30, and DAP40. Results show that RSD32 mutation exhibits superior inhibitory effects on gene  
112 expression in embryos on DAP20 and DAP30. In embryos of RSD32, homologous genes of  
113 circadian clock and Ca<sup>2+</sup> signaling pathway related genes were expressed differently from Norin61.  
114 RSD32 is a regulatory factor for wheat seed dormancy expressed at the middle developmental stage.  
115 The reduced seed dormancy in RSD32 might result from aberrant signals of circadian clock and  
116 Ca<sup>2+</sup>.

117

## 118 **Materials and Methods**

### 119 **Plant materials and growth conditions**

120 This study used a pre-harvest sprouting tolerant wheat cultivar, Norin61, and a mutant RSD32  
121 with reduced seed dormancy selected from M<sub>4</sub> population. They were derived from mutagenized  
122 Norin61 seeds using NaN<sub>3</sub> treatment [51]. Seeds were sown in plastic trays for 4 weeks: 20 seedlings  
123 were transplanted to the field in each line with 20 cm between plants and 90 cm between rows.  
124 Plants were grown under a plastic roof to avoid rainfall. Spikes were tagged at anthesis. Seeds were  
125 harvested every 10 days from 10 days after pollination (DAP10) to DAP70 and were used in  
126 germination tests and RNA-seq analysis. To minimize variation, seeds were collected only from

127 primary and secondary florets of the center spikelets.

128

## 129 **Germination test**

130 Ten whole seeds were placed on filter paper in a Petri dish containing 6 ml of distilled water.

131 Seeds were cut transversely into halves. Then ten half seeds with involved embryos were placed in a

132 Petri dish containing 6 ml of distilled water with or without ( $\pm$ ) 10  $\mu$ M of ABA (Sigma Chemical

133 Co.). The Petri dishes were then incubated in the dark at 20°C. All germination tests used three

134 replications. Germinated seeds were counted daily for 14 days. A weighted germination index (GI)

135 was calculated to give maximum weight to seeds that germinated first and to give less weight to

136 those that germinated subsequently, as described by Walker-Simmons and Sesing [52]. GI values

137 were converted into arcsine-transformed values and were used for statistical analyses.

138

## 139 **RNA isolation, library preparation and sequencing**

140 Total RNA was isolated from three embryos on DAP20, DAP30, and DAP40 using a

141 commercial kit (FastRNA Pro Green; Qbiogene Inc.). Isolated RNAs were purified using an RNA

142 Clean-up Kit (TaKaRa Bio Inc., Tokyo, Japan). All kits were used according to the respective

143 manufacturers' protocols. The concentrations of total RNA samples were quantified using a

144 spectrophotometer (Nano Drop ND-1000; Thermo Fisher Scientific Inc., Waltham, MA, USA). The



145 quality of total RNA samples was also verified (Agilent 2100 Bioanalyzer; Agilent Technologies  
146 Inc., Santa Clara, CA, USA). The 18 RNA samples (2 lines  $\times$  3 stages  $\times$  3 biological replications)  
147 were sequenced. Library construction and sequencing for the Illumina HiSeq 2500 was provided as a  
148 custom service of Eurofins Genomics K.K. (Tokyo, Japan). After the polyA fraction (mRNA) was  
149 isolated from total RNA, it was fragmented. Then double-stranded (ds) cDNA was reverse-  
150 transcribed from the fragmented mRNA. The ds cDNA fragments were processed for adaptor  
151 ligation, size selection (for 200 bp inserts), and amplification to generate strand-specific cDNA  
152 libraries. Prepared libraries were subjected to paired-end 2  $\times$  125 bp sequencing on the HiSeq 2500  
153 platform with v4 chemistry.

154

## 155 **Bioinformatics analysis**

156 We analyzed RNA-seq read data using RNA analysis tools in Galaxy/NAAC  
157 (<https://galaxy.dna.affrc.go.jp/>). Raw reads were obtained in Fastq format and were assessed for  
158 quality using FastQC. Terminal low-quality bases and adaptor sequences were trimmed off using  
159 Trimmomatic (Usadel Lab, Aachen, Germany). Clean reads were aligned against wheat survey  
160 sequence v3.0 obtained from International Wheat Genome Sequencing Consortium (IWGSC) using  
161 Tophat2 with default parameters. Cufflinks was used to assemble mapped reads. The resulting  
162 transcripts were used to quantify the expression of each gene in fragments per kilobase of transcript

163 per million mapped reads (FPKM) unit. Cuffdiff was subsequently used to compile a list of  
164 differentially expressed genes (DEGs) with fold change  $\geq 3$  and  $P$ -value  $\leq 0.01$ . BLASTX was used  
165 to align genes against the National Centre of Biotechnology Information (NCBI) database  
166 (<https://blast.ncbi.nlm.nih.gov/Blast.cgi>), the Rice Annotation Project Database  
167 (<https://rapdb.dna.affrc.go.jp/tools/blast>), Wheat Genetic Resources Database  
168 (<https://shigen.nig.ac.jp/wheat/komugi/blast/blast.jsp>) and Barley BioResources Database  
169 ([http://earth.lab.nig.ac.jp/~dclust/cgi-bin/barley\\_pub/blast\\_search.html](http://earth.lab.nig.ac.jp/~dclust/cgi-bin/barley_pub/blast_search.html)). The e-value cutoff was set  
170 at  $1e-5$ . Gene names were assigned to each gene based on top Blastx hit with the highest score.  
171 RStudio (<https://www.rstudio.com>) was used for comparing of DEGs in three developmental stages.

172

## 173 **Results**

### 174 **Seed dormancy and ABA sensitivity**

175 Norin61 showed low germination indices (GIs) of whole seeds obtained on DAP50 and earlier  
176 stages. Strong seed dormancy was observed (Fig 1). GIs of half seeds, which were released  
177 dormancy, were reduced significantly with ABA incubation until DAP50. Norin61 showed  
178 sensitivity to ABA on seed germination. Seed dormancy and ABA sensitivity were lost after DAP60  
179 in Norin61. However, RSD32 showed significantly higher GIs of whole seeds on DAP40 (50.0) and  
180 on DAP50 (90.5) than those in Norin61, although similar GIs of whole seeds were detected on

181 DAP10–DAP30. RSD32 revealed the reduced seed dormancy phenotype at late developmental  
182 stages. GIs of half seeds were higher in RSD32 than those in Norin61 on DAP20 and DAP30, but no  
183 differences were observed on DAP40 and the later stages. Inhibitory effects of ABA on germination  
184 were reduced in RSD32 on DAP20, DAP30, and DAP50. These results indicate that RSD32 showed  
185 similar levels of seed dormancy to those of Norin61 on DAP20 and DAP30. However, seed  
186 dormancy was found to be reduced significantly on DAP40–DAP50 in RSD32. Reduced ABA  
187 sensitivity was also detected on DAP50 in RSD32.

188

189 **Fig 1. Germination index (GI) whole seeds in water and half seeds in water with and without**  
190 **10  $\mu$ M ABA in Norin61 and RSD32 at different developmental stages.** Error bars represent SE.

191

## 192 **Differentially expressed genes (DEGs) during seed** 193 **development**

194 Reduction of seed dormancy was detected on DAP40 and DAP50 in RSD32. Gene  
195 expressions were compared at the middle to late developmental stages (DAP20, DAP30, DAP40)  
196 using RNA-seq analysis. Numbers of DEGs, which were down-regulated in RSD32, were 209, 228,  
197 and 49, respectively, on DAP20, DAP30, and DAP40 (Fig 2). Down-regulated genes in RSD32 were  
198 detected more on DAP20 and DAP30 than on DAP40. Numbers of DEGs, which were up-regulated

199 in RSD32, were similar at all developmental stages. RSD32 mutation preferentially inhibited gene  
200 expression. Marked effects were observed at earlier developmental stages than on DAP40, when the  
201 seed dormancy reduction started.

202

203 **Fig 2. Numbers of differentially expressed genes (DEGs) between embryos of Norin61 and**  
204 **RSD32 at different developmental stages.** UP, up-regulated genes; DOWN, down-regulated genes.

205

206 Comparison of down-regulated genes in RSD32 among developmental stages revealed that  
207 146 and 164 DEGs showed specific expression on DAP20 and DAP30, respectively, and that 62  
208 DEGs were down-regulated at both of DAP20 and DAP30 (Fig 3A). Most down-regulated genes on  
209 DAP40 showed stage-specific expression. No overlap with other developmental stages was  
210 observed. Up-regulated genes in RSD32 showed less overlap among developmental stages. Actually,  
211 most of the up-regulated genes were expressed specifically at each developmental stage (Fig 3B).

212

213 **Fig 3. Venn diagram highlighting the number of differentially expressed genes in the three**  
214 **developmental stages.** A, up-regulated genes; B, down-regulated genes.

215

216 At DAP20, down-regulated genes in RSD32 revealed several functions such as gene

217 expression, protein metabolism, oxidation–reduction process, response to stimuli, circadian rhythm,  
 218 and signal transduction (Tables 1 and 2). These genes were enriched homologous genes related to  
 219 the calcium signaling pathway, such as *CALCIUM-BINDING PROTEIN*, *CALMODULIN-BINDING*  
 220 *PROTEIN*, *EF-HAND Ca<sup>2+</sup>-BINDING PROTEIN*, *CALMODULIN-BINDING RECEPTOR-LIKE*  
 221 *CYTOPLASMIC KINASE*, *CALCIUM-DEPENDENT PROTEIN KINASE*, and *CALCIUM-*  
 222 *TRANSPORTING ATPASE*. These results indicate that unusual calcium signaling occurred in  
 223 RSD32. Furthermore, down-regulated genes involved circadian-clock-related genes. Genes  
 224 homologous to *CCA1*, *LHY*, *LNK1*, and *RVE6-LIKE* were expressed lower in RSD32 than those in  
 225 Norin61. Circadian-clock-related genes were also identified as up-regulated genes in RSD32. Genes  
 226 homologous to *FARI-RELATED SEQUENCE 12-LIKE* and *CONSTANS-LIKE 9* were found to be  
 227 expressed higher in RSD32 than in Norin61 on DAP20 (Table 3). A homologous gene to *TOCI* was  
 228 also expressed 2.4 times higher in RSD32.

229

230 Table 1 Down-regulated genes found on DAP20 in RSD32

| Putative function                                                | FPKM*  |       | Fold   |
|------------------------------------------------------------------|--------|-------|--------|
|                                                                  | N61    | RSD32 | Change |
| <b><i>Cellular component biogenesis</i></b>                      |        |       |        |
| WAT1-related protein/auxin-induced protein 5NG4                  | 80.4   | 0     | -      |
| <b><i>Cellular metabolic process</i></b>                         |        |       |        |
| haloacid dehalogenase-like hydrolase domain-containing protein 3 | 2235.6 | 744.7 | 3.0    |
| pheophorbide a oxygenase                                         | 107.9  | 29.5  | 3.7    |
| photosystem II reaction center PSB28                             | 62.7   | 0     | -      |
| soluble inorganic pyrophosphatase                                | 312.8  | 40.6  | 7.7    |

***Cellular process***

|                                                  |       |       |      |
|--------------------------------------------------|-------|-------|------|
| CDGSH iron-sulfur domain-containing protein NEET | 160.2 | 45.6  | 3.5  |
| CytHSP70                                         | 63.1  | 5.1   | 12.3 |
| hypoxia-induced gene domain 5                    | 773.8 | 231.1 | 3.3  |

***Circadian rhythm***

|           |       |       |     |
|-----------|-------|-------|-----|
| LNK1      | 766.5 | 198.7 | 3.9 |
| LNK2      | 125.7 | 39.9  | 3.2 |
| LNK4-like | 554.4 | 129.2 | 4.3 |

***Developmental process***

|                                       |       |      |     |
|---------------------------------------|-------|------|-----|
| Senescence associated gene 20 (SAG20) | 231.0 | 45.5 | 5.1 |
|---------------------------------------|-------|------|-----|

***Gene expression***

|                                                          |       |       |     |
|----------------------------------------------------------|-------|-------|-----|
| antagonist of like heterochromatin protein 1-like (ALP1) | 53.9  | 15.6  | 3.4 |
| B-box zinc finger protein 25-like                        | 356.3 | 108.8 | 3.3 |
| calmodulin-binding protein 60 D-like                     | 213.9 | 46.0  | 4.6 |
| lariat debranching enzyme                                | 762.0 | 154.6 | 4.9 |
| light-inducible protein CPRF2                            | 436.7 | 127.3 | 3.4 |
| multiprotein bridging factor 1 (MBF1)                    | 530.2 | 81.4  | 6.5 |
| NAC domain-containing protein 74                         | 574.9 | 127.1 | 4.5 |
| pentatricopeptide repeat-containing protein              | 66.3  | 16.5  | 4.0 |
| PsbB mRNA maturation factor Mbb1                         | 721.4 | 169.4 | 4.3 |
| ribosomal protein S8                                     | 712.9 | 224.4 | 3.2 |
| RNA-binding motif protein                                | 278.0 | 47.2  | 5.9 |
| WRKY11 transcription factor                              | 97.1  | 0     | -   |

***Localization***

|                                                |       |      |     |
|------------------------------------------------|-------|------|-----|
| calcium-transporting ATPase 1                  | 199.7 | 55.3 | 3.6 |
| glucose-6-phosphate/phosphate-tranlocator-like | 192.4 | 36.7 | 5.2 |
| P-type ATPase                                  | 215.6 | 68.5 | 3.1 |

***Molecular function regulator***

|                                      |       |      |     |
|--------------------------------------|-------|------|-----|
| kelch repeat-containing protein-like | 191.3 | 38.6 | 5.0 |
|--------------------------------------|-------|------|-----|

***Organic substance metabolic process***

|                              |       |      |     |
|------------------------------|-------|------|-----|
| phosphoglycerate mutase gpmB | 112.8 | 36.1 | 3.1 |
|------------------------------|-------|------|-----|

***Oxidation–reduction process***

|                                               |       |      |     |
|-----------------------------------------------|-------|------|-----|
| 3-beta hydroxysteroid dehydrogenase/isomerase | 253.2 | 70.3 | 3.6 |
| Aldehyde dehydrogenase (ALDH)                 | 186.8 | 57.7 | 3.2 |
| cytochrome P450                               | 70.3  | 21.7 | 3.2 |
| L-ascorbate oxidase                           | 86.5  | 20.0 | 4.3 |

|                                                                    |        |       |     |
|--------------------------------------------------------------------|--------|-------|-----|
| NAD(P)-binding Rossmann-fold protein                               | 149.6  | 48.5  | 3.1 |
| NADH dehydrogenase                                                 | 855.1  | 269.2 | 3.2 |
| nitrate reductase [NAD(P)H]                                        | 313.3  | 44.9  | 7.0 |
| omega-3 fatty acid desaturase                                      | 228.9  | 71.7  | 3.2 |
| premnaspirodiene oxygenase-like                                    | 162.0  | 0     | -   |
| respiratory burst oxidase B-like                                   | 372.0  | 62.3  | 6.0 |
| retinal dehydrogenase                                              | 72.8   | 0     | -   |
| <b><i>Protein metabolic process</i></b>                            |        |       |     |
| ADP-ribosylation factor                                            | 74.2   | 14.6  | 5.1 |
| ankyrin repeat-containing protein NPR4                             | 305.4  | 85.5  | 3.6 |
| Aspartic proteinase Asp1                                           | 303.3  | 61.3  | 4.9 |
| calcium-dependent protein kinase                                   | 1010.3 | 184.9 | 5.5 |
| E3 ubiquitin-protein ligase                                        | 201.2  | 65.0  | 3.1 |
| Leaf rust 10 disease-resistance locus receptor-like protein kinase | 98.4   | 0     | -   |
| prolyl 4-hydroxylase 6 precursor                                   | 282.7  | 54.4  | 5.2 |
| receptor-like protein kinase                                       | 165.4  | 54.5  | 3.0 |
| RHOMBOID-like protein 2                                            | 537.6  | 132.3 | 4.1 |
| wall-associated receptor kinase 2-like (WAK2-like)                 | 159.8  | 44.7  | 3.6 |
| <b><i>Response to stimulus</i></b>                                 |        |       |     |
| 16.9a kDa heat-shock protein                                       | 501.7  | 152.5 | 3.3 |
| ATA15                                                              | 630.6  | 201.9 | 3.1 |
| Early responsive to dehydration 15-like                            | 1738.5 | 461.4 | 3.8 |
| heat shock cognate 70 kDa protein 2-like                           | 443.6  | 115.3 | 3.8 |
| heat-responsive transcription factor                               | 284.0  | 90.1  | 3.2 |
| small EDRK-rich factor 2-like (SERF2)                              | 1256.2 | 376.9 | 3.3 |
| EXORDIUM-like                                                      | 184.8  | 19.9  | 9.3 |
| hemoglobin Hb2                                                     | 298.8  | 78.7  | 3.8 |
| ethylene-responsive transcription factor ERF071-like               | 215.8  | 46.9  | 4.6 |
| indole-3-acetic acid-amido synthetase (GH3.3)                      | 367.6  | 110.8 | 3.3 |
| RVE6-like                                                          | 241.9  | 48.5  | 5.0 |
| <b><i>Secondary metabolic process</i></b>                          |        |       |     |
| phenylalanine ammonia-lyase-like                                   | 104.1  | 11.0  | 9.5 |
| <b><i>Signal transduction</i></b>                                  |        |       |     |
| calcium-binding protein                                            | 93.6   | 0     | -   |
| calmodulin-binding receptor-like cytoplasmic kinase 3              | 114.2  | 33.2  | 3.4 |

|                                                |        |       |     |
|------------------------------------------------|--------|-------|-----|
| calmodulin-related protein                     | 581.5  | 133.8 | 4.3 |
| CBL-interacting protein kinase 31              | 358.5  | 103.7 | 3.5 |
| EF-hand Ca <sup>2+</sup> -binding protein CCD1 | 334.6  | 81.5  | 4.1 |
| mitogen-activated protein kinase               | 1358.4 | 387.6 | 3.5 |
| SOUL heme-binding domain containing protein    | 416.0  | 59.6  | 7.0 |
| <b>Others</b>                                  |        |       |     |
| retrotransposon protein                        | 54.5   | 0     | -   |
| serine-rich protein                            | 179.1  | 38.2  | 4.7 |

231 \*: FPKM denotes Fragments Per Kilobase of transcript per Million mapped reads.

232

233 Table 2 Down-regulated genes found on DAP20 and DAP30 in RSD32

| Putative function                           | FPKM*  |        | Fold   |
|---------------------------------------------|--------|--------|--------|
|                                             | N61    | RSD32  | Change |
| <b>Cellular component biogenesis</b>        |        |        |        |
| 16.9 kDa class I heat shock protein 1-like  | 3522.9 | 815.5  | 4.3    |
| 17.5 kDa class II heat shock protein        | 990.7  | 168.8  | 5.9    |
| 17.5kDa heat-shock protein                  | 312.7  | 57.3   | 5.5    |
| 17.9 kDa class I heat shock protein         | 727.0  | 91.4   | 8.0    |
| 18.6 kDa class III heat shock protein-like  | 2564.1 | 693.4  | 3.7    |
| 23.2 kDa heat shock protein-like            | 189.4  | 31.3   | 6.0    |
| heat shock protein 16.9                     | 1006.8 | 61.4   | 16.4   |
| small heat shock protein 17.3 Kda           | 7957.7 | 1891.0 | 4.2    |
| small heat shock protein Hsp23.5            | 1918.5 | 283.3  | 6.8    |
| <b>Cellular process</b>                     |        |        |        |
| 70 kDa peptidyl-prolyl isomerase            | 701.2  | 176.5  | 4.0    |
| BAG family molecular chaperone regulator 6  | 99.8   | 18.5   | 5.4    |
| peptidyl-prolyl cis-trans isomerase         | 1101.5 | 288.2  | 3.8    |
| regulator of chromosome condensation (RCC1) | 376.7  | 81.8   | 4.6    |
| <b>Circadian rhythm</b>                     |        |        |        |
| CCA1                                        | 1407.7 | 313.7  | 4.5    |
| LHY                                         | 139.5  | 27.2   | 5.1    |
| <b>Gene expression</b>                      |        |        |        |
| lariat debranching enzyme                   | 2892.9 | 763.9  | 3.8    |
| zinc finger MYM-type protein 1-like         | 283.4  | 62.3   | 4.5    |
| <b>Oxidation-reduction process</b>          |        |        |        |
| early nodulin-93-like                       | 421.7  | 111.5  | 3.8    |



***Protein metabolic process***

receptor-like protein kinase 158.9 0 -

***Response to stimulus***

14.5 kDa heat-shock protein 1341.7 387.5 3.5  
 23.6 kDa heat shock protein 1410.9 214.1 6.6  
 heat shock cognate 70 kDa protein 93.9 7.4 12.7  
 heat shock protein 90 1903.2 407.3 4.7  
 ultraviolet-B receptor UVR8 266.0 59.7 4.5  
 universal stress protein PHOS32 739.4 212.8 3.5  
 RVE6-like 284.6 60.4 4.7

***Secondary metabolic process***

4-coumarate--CoA ligase 3 138.8 22.5 6.2

234 \*: FPKMs represent values obtained on DAP20.

235

236 Table 3 Up-regulated genes found on DAP20 in RSD32

| Putative function                                      | FPKM  |        | Fold   |
|--------------------------------------------------------|-------|--------|--------|
|                                                        | N61   | RSD32  | Change |
| <b><i>Cellular component organization</i></b>          |       |        |        |
| vasodilator-stimulated phosphoprotein-like             | 25.9  | 94.1   | 3.6    |
| <b><i>Circadian rhythm</i></b>                         |       |        |        |
| CONSTANS-LIKE 9                                        | 55.1  | 162.8  | 3.0    |
| <b><i>Developmental process</i></b>                    |       |        |        |
| myb-related protein Zm38-like                          | 50.5  | 153.8  | 3.0    |
| <b><i>Gene expression</i></b>                          |       |        |        |
| AT hook motif containing protein                       | 0     | 49.7   | -      |
| dehydration-responsive element-binding protein 2C-like | 561.8 | 1696.4 | 3.0    |
| Eukaryotic translation initiation factor 2 subunit 3   | 0     | 414.3  | -      |
| heat shock factor C1b                                  | 52.7  | 279.4  | 5.3    |
| serine/threonine-protein kinase                        | 0     | 177.8  | -      |
| suppressor protein SRP40-like                          | 50.6  | 224.3  | 4.4    |
| transcription initiation factor TFIID subunit 4-like   | 140.2 | 438.3  | 3.1    |
| zinc finger MYM-type protein 1                         | 57.8  | 204.7  | 3.5    |
| <b><i>Multi-organism process</i></b>                   |       |        |        |
| hyphally regulated protein-like                        | 0     | 63.6   | -      |
| <b><i>Organic substance metabolic process</i></b>      |       |        |        |
| 3-ketoacyl-CoA synthase 12                             | 115.4 | 352.0  | 3.1    |

|                                                                              |        |        |     |
|------------------------------------------------------------------------------|--------|--------|-----|
| glyoxalase family like protein                                               | 424.3  | 1473.3 | 3.5 |
| thiamine thiazole synthase 2                                                 | 234.6  | 750.6  | 3.2 |
| <b><i>Oxidation–reduction process</i></b>                                    |        |        |     |
| cytochrome P450 71C1                                                         | 292.7  | 1483.4 | 5.1 |
| divinyl chlorophyllide a 8-vinyl-reductase                                   | 0      | 65.9   | -   |
| <b><i>Protein metabolic process</i></b>                                      |        |        |     |
| glutathione S-transferase GSTU6                                              | 738.4  | 2230.3 | 3.0 |
| Histone acetyltransferase HAC12                                              | 16.1   | 59.9   | 3.7 |
| TNP2-like protein                                                            | 295.6  | 1157.1 | 3.9 |
| WD repeat domain phosphoinositide-interacting protein 3                      | 34.8   | 140.4  | 4.0 |
| <b><i>Response to stimulus</i></b>                                           |        |        |     |
| root peroxidase                                                              | 35.7   | 198.2  | 5.6 |
| serine proteinase inhibitor-like allergen                                    | 118.3  | 614.7  | 5.2 |
| FAR1-related sequence12-like                                                 | 37.0   | 121.2  | 3.3 |
| dormancy-associated protein 1-like/auxin-repressed protein-like protein ARP1 | 2425.0 | 7415.5 | 3.1 |
| Dehydrin DHN3                                                                | 565.1  | 1840.4 | 3.3 |
| Universal stress protein A-like                                              | 125.5  | 382.8  | 3.0 |
| <b><i>Signal transduction</i></b>                                            |        |        |     |
| microtubule-associated serine/threonine-protein kinase 4-like                | 35.1   | 106.2  | 3.0 |
| <b><i>Others</i></b>                                                         |        |        |     |
| transposon protein                                                           | 0      | 63.2   | -   |

237

238

239 Down-regulated genes found on DAP30 were also enriched with several functions. Genes

240 homologous to *PIF1-LIKE CCA1* and *LHY* were down-regulated in RSD32 (Table 2 and S1 Table).

241 However, genes homologous to *PHYTOCLOCK1* and *LUX-B* showed higher expression in RSD32

242 on DAP30 (Table 4). Genes homologous to *CONSTANS-LIKE 9* and *FAR1-RELATED SEQUENCE*

243 *5-LIKE* were expressed, respectively, 2.7 times and 2.5 times higher in RSD32. Expressions of genes

244 homologous to *CCA1* and *LHY* were inhibited in RSD32 at both DAP20 and DAP30. Down-

245 regulated genes in RSD32 at both of DAP20 and DAP30 were enriched to *HEAT SHOCK*

246 *PROTEINS* (Table 2). Although some DEGs were identified as gene expression, oxidation–reduction

247 process and protein metabolic process related genes on DAP40, circadian clock related genes were

248 not found in DEGs on DAP40 (S2 and S3 Tables).

249

250 Table 4 Up-regulated genes found on DAP30 in RSD32

| Putative function                                 | FPKM  |        | Fold Change |
|---------------------------------------------------|-------|--------|-------------|
|                                                   | N61   | RSD32  |             |
| <b><i>Cellular component biogenesis</i></b>       |       |        |             |
| WAT1-related protein                              | 0     | 34.7   | -           |
| extracellular glycosidase CRH11-like              | 0     | 391.6  | -           |
| <b><i>Cellular metabolic process</i></b>          |       |        |             |
| lipid phosphate phosphatase 3                     | 18.8  | 80.0   | 4.3         |
| <b><i>Circadian rhythm</i></b>                    |       |        |             |
| LUX-B                                             | 68.5  | 246.9  | 3.6         |
| PHYTOCLOCK1                                       | 161.1 | 536.4  | 3.3         |
| <b><i>Developmental process</i></b>               |       |        |             |
| myosin-14-like                                    | 0     | 110.3  | -           |
| <b><i>Gene expression</i></b>                     |       |        |             |
| B3 domain-containing protein                      | 0     | 218.7  | -           |
| trihelix transcription factor GTL1-like           | 0     | 369.0  | -           |
| zinc finger protein 410                           | 0     | 8707.7 | -           |
| <b><i>Localization</i></b>                        |       |        |             |
| sugar transporter ERD6-like 4                     | 39.5  | 259.6  | 6.6         |
| <b><i>Nucleic acid metabolic process</i></b>      |       |        |             |
| Superkiller viralicidic activity 2-like 2         | 259.5 | 868.1  | 3.3         |
| <b><i>Organic substance metabolic process</i></b> |       |        |             |
| plastid alpha-1,4-glucan phosphorylase            | 10.8  | 48.9   | 4.5         |
| <b><i>Oxidation–reduction process</i></b>         |       |        |             |
| premnaspirodiene oxygenase-like                   | 0     | 1048.3 | -           |
| <b><i>Protein metabolic process</i></b>           |       |        |             |
| deSI-like protein sdu1                            | 40.9  | 185.7  | 4.5         |

|                                      |       |        |     |
|--------------------------------------|-------|--------|-----|
| Lysine-specific demethylase 8        | 20.9  | 131.2  | 6.3 |
| RING-H2 finger protein               | 0     | 3545.2 | -   |
| Subtilisin-chymotrypsin inhibitor-2A | 262.7 | 913.9  | 3.5 |
| <b><i>Response to stimulus</i></b>   |       |        |     |
| disease resistance protein RGA2-like | 282.2 | 872.3  | 3.1 |
| <b><i>Signal transduction</i></b>    |       |        |     |
| Serine/threonine-protein kinase CTR1 | 91.6  | 352.7  | 3.9 |

---

251

252 **Temporal expression of homologous to circadian clock and**

253 **Ca<sup>2+</sup> signaling pathway related genes during seed**

254 **development**

255 Among DEGs, genes homologous to circadian clock and Ca<sup>2+</sup> signal transduction related

256 genes were abundant. In Norin61, genes homologous to *CCA1* and *LHY* showed the highest

257 expression on DAP20. Their expressions were lower following seed development (Table 5). RSD32

258 showed lower expressions of *CCA1* and *LHY* than those of Norin61 on DAP20 or DAP30. However,

259 genes homologous to *TOC1* expressed higher in RSD32 than those in Norin61 at all developmental

260 stages. Homologous gene to *PHYTOCLOCK1* showed higher expression in RSD32 on DAP20 and

261 DAP30, similarly to *TOC1*, but the difference was less apparent on DAP40. In other circadian clock

262 related genes, genes homologous to *LUX-B* and *CONSTANS-LIKE* showed higher expressions in

263 RSD32. Also, genes homologous to *LNK1*, *FAR1*, and *RVE6-LIKE* showed lower expression in

264 RSD32. Consequently, RSD32 mutation was inferred to affect the expressions of circadian clock

265 related genes in different manners. DEGs related to circadian clock regulation were divided into two

266 groups based on mutant effects on the expression for inhibition or enhancement.

267

268 Table 5 FPKMs of circadian rhythm and Ca signaling related genes at different developmental stages

269 in Norin61 and RSD32

| Putative function                                                         | Norin61 |       |       | RSD32 |       |       | RSD32  |
|---------------------------------------------------------------------------|---------|-------|-------|-------|-------|-------|--------|
|                                                                           | DAP20   | DAP30 | DAP40 | DAP20 | DAP30 | DAP40 | Effect |
| <b><i>Circadian rhythm</i></b>                                            |         |       |       |       |       |       |        |
| CCA1                                                                      | 1407.7  | 747.8 | 435.2 | 313.7 | 138.7 | 686.5 | -      |
| LHY                                                                       | 139.5   | 117.4 | 39.6  | 27.2  | 18.2  | 43.9  | -      |
| TOC1/PPR1                                                                 | 251.2   | 496.3 | 532.0 | 594.9 | 714.8 | 694.3 | +      |
| PHYTOCLOCK 1                                                              | 3.0     | 161.1 | 557.0 | 70.6  | 536.4 | 448.6 | +      |
| LUX-B                                                                     | 0.0     | 68.5  | 134.9 | 30.9  | 246.9 | 107.0 | +      |
| LNK1                                                                      | 902.4   | 899.7 | 414.4 | 244.4 | 432.2 | 480.1 | -      |
| FAR1-related sequence<br>5-like                                           | 1.4     | 617.8 | 164.2 | 0.0   | 176.2 | 86.6  | -      |
| RVE6-like                                                                 | 241.9   | 110.0 | 9.2   | 48.5  | 38.4  | 27.3  | -      |
| CONSTANS-like                                                             | 55.1    | 172.8 | 282.5 | 162.8 | 458.4 | 317.4 | +      |
| <b><i>Ca signaling</i></b>                                                |         |       |       |       |       |       |        |
| calcium-dependent<br>protein kinase                                       | 1010.3  | 184.9 | 93.9  | 184.9 | 148.4 | 122.7 | -      |
| calcium-binding protein                                                   | 93.6    | 6.1   | 0.0   | 0.0   | 20.2  | 4.7   | -      |
| calmodulin-related<br>protein                                             | 581.5   | 93.8  | 2.4   | 133.8 | 77.7  | 7.1   | -      |
| calmodulin-binding<br>protein 60 D-like                                   | 213.9   | 46.8  | 5.9   | 46.0  | 62.2  | 8.1   | -      |
| CBL-interacting protein<br>kinase 31                                      | 358.5   | 69.4  | 7.6   | 103.7 | 41.4  | 5.9   | -      |
| calmodulin-binding<br>receptor-like                                       | 114.2   | 35.4  | 11.9  | 33.2  | 27.0  | 11.0  | -      |
| cytoplasmic kinase 3<br>EF-hand Ca <sup>2+</sup> -binding<br>protein CCD1 | 334.6   | 47.9  | 2.3   | 81.5  | 71.8  | 2.3   | -      |

270 Effects of RSD32 on gene expression represent + (positive) and – (negative).

271

272 In Norin61, genes homologous to calcium signaling pathway related genes, *CALMODULIN-*  
273 *BINDING RECEPTOR LIKE CYTOPLASMIC KINASE 3*, *CALCIUM-BINDING PROTEIN*,  
274 *CALMODULIN-RELATED PROTEIN*, *CBL-INTERACTING PROTEIN KINASE 31*,  
275 *CALMODULIN-BINDING PROTEIN 60D-LIKE*, and *CALCIUM-DEPENDENT PROTEIN KINASE*  
276 were found to be specifically expressed on DAP20. Their expressions were found to be diminished  
277 on DAP30 and DAP40 (Table 4). These genes showed specific expressions at the middle  
278 developmental stage. Expressions of genes homologous to calcium signaling pathway related genes  
279 were found to be markedly inhibited on DAP20 in RSD32. All Ca signaling pathway related genes  
280 were down-regulated similarly.

281

## 282 **Discussion**

283 Norin61 is a pre-harvest sprouting tolerant cultivar with strong seed dormancy. Although seed  
284 dormancy was maintained until DAP50, dormancy release was found on DAP60 and in later  
285 developmental stages. By contrast, RSD32 showed reduced seed dormancy on DAP40. Dormancy  
286 was found to be completely broken on DAP50. Levels of seed dormancy differed between Norin61  
287 and RSD32 at the late developmental stages (DAP40 and DAP50). Both lines showed low  
288 germination ability in whole seeds. No differences were observed at middle developmental stages  
289 (DAP20 and DAP30). Because half seeds, which have been released from dormancy, showed poor

290 germination, the germination ability was not fully developed at this stage. Transcriptome analysis of  
291 the gene expression in embryos of Norin61 and RSD32 at different developmental stages revealed  
292 that gene expressions were conspicuously different in both lines at the middle developmental stages,  
293 but not at the late developmental stages, which showed different levels of seed dormancy. These  
294 results suggest that RSD32 expresses at the middle developmental stage or earlier stage before seed  
295 dormancy development. Reduced seed dormancy in RSD32 is associated with genes expressed at the  
296 middle developmental stage.

297 Genes homologous to circadian clock regulation related genes are differentially expressed in  
298 embryos of Norin61 and RSD32 at the middle developmental stages. For the component of central  
299 oscillator, genes homologous to *CCA1* and *LHY* were down-regulated in RSD32. However, *TOC1*  
300 and *PHYTOCLOCK1* were up-regulated in RSD32. In *Arabidopsis*, *CCA1* and *LHY* are the morning  
301 expressed type; *TOC1* and *PHYTOCLOCK1* are the evening expressed type [38]. RSD32 affects the  
302 expressions of circadian clock regulation related genes depending on the circadian clock regulation  
303 function. Moreover, genes homologous to *LNKI*, *FARI-RELATED SEQUENCE5-LIKE*, *RVE6-*  
304 *LIKE* and *CONSTANS-LIKE*, which interact with clock components, showed modified expressions  
305 in RSD32. In *Arabidopsis*, Penfield and Hall [37] report that circadian clock related genes were  
306 involved in dormancy release and that they affected the response to ABA and gibberellic acid (GA).  
307 Footitt et al. [40] reported that the balance between the evening and morning phases of the clock

308 contributes to the interpretation of temperature signals, determining cycles of dormancy induction  
309 and relief in *Arabidopsis*. Aberrant function of the central oscillator affects ABA biosynthesis,  
310 signal transduction and several abiotic stress tolerances [38, 39, 41, 53–58]. The circadian clock  
311 might regulate several stress responses through ABA biosynthesis and the signal transduction  
312 pathway. Although the relation between circadian clock regulation and seed dormancy remains  
313 unknown in wheat, the reduction of seed dormancy in RSD32 might result from aberrant ABA  
314 signaling derived from irrelevant regulation of the circadian clock.

315 Genes homologous to calcium signaling pathway related genes were down-regulated in  
316 embryos of RSD32.  $Ca^{2+}$  sensor proteins, calmodulin-related protein, CDPK and CIPK, were  
317 identified as down-regulated genes in RSD32. In *Arabidopsis*,  $Ca^{2+}$  influx, and the expressions of  
318 *CALMODULIN-LIKE PROTEIN 39 (CML39)*, *CALCIUM DEPENDENT PROTEIN KINASE*  
319 (*CDPK*, *CPK*) and *CBL-INTERACTING PROTEIN KINASE (CIPK)* affect ABA signaling [31, 33,  
320 35, 59–61]. In monocot species, *CIPK* and *CPK* also affect sensitivity to ABA [32, 34, 36].  
321 Furthermore, Somyong et al. [62, 63] reported that the region-located wheat pre-harvest sprouting  
322 regulating QTL, QPhs.cnl-2B.1, involved several genes associated with  $Ca^{2+}$  signaling pathway,  
323 such as *CDPKs* and *CALMODULIN/ $Ca^{2+}$ -DEPENDENT PROTEIN KINASE*. In this study, genes  
324 homologous to calcium signaling pathway related genes were found to be temporarily expressed in  
325 wheat embryos on DAP20: the middle developmental stage. Temporal induction of these genes was



326 lost in RSD32. The seed dormancy induction might be disturbed by attenuated Ca signaling. Martí  
327 Ruiz et al. [50] reported that *CALMODULIN-LIKE 24 (CML24)* regulates the expression of *TOCI*  
328 through Ca<sup>2+</sup>-dependent pathway in *Arabidopsis*. Calcium signaling might affect the expression of  
329 circadian clock related genes in wheat. Relations among seed dormancy, ABA signal transduction,  
330 circadian clock regulation and Ca<sup>2+</sup> signaling remain unknown, but they should be investigated  
331 further especially in wheat. Few reports describe the functions of circadian clock and Ca<sup>2+</sup> signaling  
332 on the regulation of wheat seed dormancy. RSD32 is a useful tool for investigating the complex  
333 network of these regulatory pathways in wheat.

334       Wheat embryo development is completed around 15 days after pollination (DAP15).  
335 Endosperms are developing continuously. In fact, the seed reaches maximum fresh weight at the  
336 middle developmental stage (DAP15–DAP30) [2]. Moisture contents of seeds are still high at this  
337 stage. At the late developmental stage (DAP30–DAP50), moisture contents of seeds are decreasing;  
338 seeds enter the dormant state. Physiological states differ between the seeds at the middle and late  
339 developmental stages. Although some DEGs were down-regulated in RSD32 at both DAP20 and  
340 DAP30, most DEGs identified on DAP40 are specifically expressed. No overlap with other  
341 developmental stages was observed. These results also indicate that seeds on DAP20 and DAP30  
342 have similar physiological conditions, but they differ from those found on DAP40. Most studies  
343 investigating the regulation of seed dormancy have specifically examined the regulatory pathways of

344 the late developmental stage. In monocot species, *MFT*, *MAP KINASE KINASE* and *AlaAT* have  
345 been identified as QTLs for regulating seed dormancy [20, 21, 23]. These genes are associated with  
346 maintenance and release of seed dormancy. They express at the late developmental stage. Because  
347 RSD32 expressed at the middle developmental stage, RSD32 might be an important gene for the  
348 regulation of seed dormancy, acting more upstream in the regulation pathway. In *Arabidopsis*,  
349 *DOG1* and seed maturation regulators function for the regulation of seed dormancy and express at  
350 early to middle developmental stages [10, 13–19]. Wheat genes homologous to *DOG1* and seed  
351 maturation regulators are also expressed at early to middle developmental stages [25]. Rikiishi et al.  
352 [51] reported decreased expression of *TaDOG1* in the embryos of RSD32. These results suggest that  
353 RSD32 acts upstream on *TaDOG1* function. Regulation factor expressed at the middle  
354 developmental stage might be associated with seed dormancy initiation. Although many studies have  
355 examined the development and maintenance of dormancy, the regulation mechanism for initiation  
356 and induction of dormancy remains unknown. Early events of seed dormancy regulation in wheat are  
357 elucidated by the identification of RSD32 function. Furthermore, understanding the relations among  
358 regulation systems expressed at different developmental stages is necessary to elucidate the overall  
359 network regulating seed dormancy.

360

## 361 **References**

- 362 1. Gubler F, Millar AA, Jacobsen JV. Dormancy release, ABA and pre-harvest sprouting. *Curr Opin*  
363 *Plant Biol.* 2005;8: 183–187.
- 364 2. Noda K, Kawabata C, Kanzaki K. Re-classification developmental stage of wheat grain. *Breed*  
365 *Sci.* 1994;44: 115–120.
- 366 3. Finkelstein RR, Gampala SSL, Rock CD. Abscisic acid signaling in seeds and seedling. *Plant*  
367 *Cell.* 2002;14: S15–S45.
- 368 4. Himmelbach A, Tang Y, Grill E. Relay and control of abscisic acid signaling. *Curr Opin Plant*  
369 *Biol.* 2003;6: 470–479.
- 370 5. Nambara E, Marion-Poll A. ABA action and interaction in seeds. *Trends Plant Sci.* 2003;8: 213–  
371 217.
- 372 6. Kushiro T, Okamoto M, Nakabayashi K, Yamagishi K, Kitamura S, Asami T, et al. The  
373 *Arabidopsis* cytochrome P450CYP707A encodes ABA 8'-hydroxylases: key enzymes in ABA  
374 catabolism. *EMBO J.* 2004;23: 1647–1656.
- 375 7. Saito S, Hirai N, Matsumoto C, Ohigarashi H, Ohta D, Sakata K, et al. *Arabidopsis* CYP707As  
376 encode (+)-abscisic acid 8'-hydroxylase, a key enzyme in the oxidative catabolism of abscisic  
377 acid. *Plant Physiol.* 2004;134: 1439–1449.
- 378 8. Okamoto M, Kuwahara A, Seo M, Kushiro T, Asami T, Hirai N, et al. CYP707A1 and  
379 CYP707A2, which encode abscisic acid 8'-hydroxylases, are indispensable for proper control

- 380 of seed dormancy and germination in *Arabidopsis*. *Plant Physiol.* 2006;141: 97–107.
- 381 9. Seo M, Hanada A, Kuwahara A, Endo A, Okamoto M, Yanauchi Y, et al. Regulation of hormone  
382 metabolism in *Arabidopsis* seeds: phytochrome regulation of abscisic acid metabolism and  
383 abscisic acid regulation of gibberellin metabolism. *Plant J.* 2006;48: 354–366.
- 384 10. Bentsink L, Jowett J, Hanhart CJ, Koornneef M. Cloning of *DOG1*, a quantitative trait locus  
385 controlling seed dormancy in *Arabidopsis*. *Proc Natl Acad Sci USA.* 2006;103: 17042–17047.
- 386 11. Née G, Kramer K, Nakabayashi K, Yuan B, Xiang Y, Miatton E, et al. DELAY OF  
387 GERMINATION 1 (*DOG1*) requires PP2C phosphatases of the ABA signalling pathway to  
388 control seed dormancy. *Nat Commun.* 2017;8: 72.
- 389 12. Nishimura N, Tsuchiya W, Moresco JJ, Hayashi Y, Satoh K, Kaiwa N, et al. Control of seed  
390 dormancy and germination by *DOG1*-*AHG1* PP2C phosphatase complex via binding to heme.  
391 *Nat Commun.* 2018;9: 2132.
- 392 13. Giraudat J, Hauge BM, Valon C, Smalle J, Parcy F, Goodman HN. Isolation of the *Arabidopsis*  
393 *Abi3* gene by positional cloning. *Plant Cell.* 1992;4: 1251–1261.
- 394 14. Lotan T, Ohto M, Yee KM, West MAL, low R, Kwong RW, et al. *Arabidopsis* LEAFY  
395 COTYLEDONE1 is sufficient to induce embryo development in vegetative cells. *Cell.*  
396 1998;93: 1195–1205.
- 397 15. Luerßen H, Kirik V, Herrmann P, Miséra S. *FUSCA3* encodes a protein with a conserved

- 398 VP1/ABI3-like B3 domain which is of functional importance for the regulation of seed  
399 maturation in *Arabidopsis thaliana*. Plant J. 1998;15: 755–764.
- 400 16. Stone SL, Kwong LW, Yee KM, Pelletier J, Lepiniec L, Fischer RL, et al. LEAFY  
401 COTYLEDONE2 encodes a B3 domain transcription factor that induce embryo development.  
402 Proc Natl Acad Sci USA. 2001;98: 11806–11811.
- 403 17. Kroj T, Savino G, Valon C, Giraudat J, Parcy F. Regulation of storage protein gene expression in  
404 *Arabidopsis*. Development. 2003;130: 6065–6073.
- 405 18. Kagaya Y, Toyoshima R, Okuda R, Usui H, Yamamoto A, Hattori T. LEAFY COTYLEDON1  
406 controls seed storage genes through its regulation of FUSCA3 and ABSCISIC ACID  
407 INSENSITIVE3. Plant Cell Physiol. 2005;46: 399–406.
- 408 19. To A, Valon C, Savino G, Guileminot J, Devic M, Giraudat J, et al. A network of local and  
409 redundant gene regulation governs *Arabidopsis* seed maturation. Plant Cell. 2006;18: 1642–  
410 1651.
- 411 20. Nakamura S, Abe F, Kawahigashi H, Nakazono K, Tagiri A, Matsumoto T, et al. A Wheat  
412 homologue of *MOTHER OF FT AND TFL1* acts in the regulation of germination. Plant Cell.  
413 2011;23: 3215–3229.
- 414 21. Torada A, Koike M, Ogawa T, Takenouchi Y, Tadamura K, Wu J, et al. A causal gene for seed  
415 dormancy on wheat chromosome 4A encodes a MAP kinase kinase. Curr Biol. 2016;26: 782–

- 416           787.
- 417   22. Sugimoto K, Takeuchi Y, Ebana K, Miyao A, Hirochika H, Hara N, et al. Molecular cloning of  
418           Sdr4, a regulator involved in seed dormancy and domestication of rice. *Proc Natl Acad Sci*  
419           USA. 2010;107: 5792–5797.
- 420   23. Sato K, Yamane M, Yamaji N, Kanamori H, Tagiri A, Schwerdt JG, et al. Alanine  
421           aminotransferase controls seed dormancy in barley. *Nat Commun*. 2016;7: 11625.
- 422   24. Rikiishi K, Matsuura T, Maekawa M. *TaABF1*, *ABA response element binding factor 1*, is  
423           related to seed dormancy and ABA sensitivity in wheat (*Triticum aestivum* L.) seeds. *J Cereal*  
424           *Sci*. 2010;52: 236–238.
- 425   25. Rikiishi K, Maekawa M. Seed maturation regulators are related to the control of seed dormancy  
426           in wheat (*Triticum aestivum* L.). *PLoS ONE*. 2014;9(9): e107618.
- 427   26. Dodd AN, Kudla J, Sanders D. The language of calcium signaling. *Annu Rev Plant Biol*.  
428           2010;61: 593–620.
- 429   27. Zhang L, Du L, Poovaiah BW. Calcium signaling and biotic defense responses in plants. *Plant*  
430           *Signal Behav*. 2014;9: e973818.
- 431   28. Bender KW, Snedden WA. Calcium-related proteins step out from the shadow of their  
432           namesake. *Plant Physiol*. 2013;163: 486–495.
- 433   29. Edel KH, Kudla J. Increasing complexity and versatility: how the calcium signaling toolkit was

- 434 shaped during plant land colonization. *Cell Calcium*. 2015;57: 231–246.
- 435 30. Zhu X, Dunand C, Snedden W, Galaud J-P. CaM and CML emergence in the green lineage.  
436 *Trends Plant Sci*. 2015;20: 483–489.
- 437 31. Zhao R, Sun H-L, Mei C, Wang X-J, Yan L, Liu R, et al. The Arabidopsis Ca<sup>2+</sup>-dependent  
438 protein kinase CPK12 negatively regulates abscisic acid signaling in seed germination and post-  
439 germination growth. *New Phytol*. 2011;192: 61–73.
- 440 32. Jiang S, Zhang D, Wang L, Pan J, Liu Y, Kong X, et al. A maize calcium-dependent protein  
441 kinase gene, *ZmCPK4*, positively regulated abscisic acid signaling and enhanced drought stress  
442 tolerance in transgenic *Arabidopsis*. *Plant Physiol Biochem*. 2013;71: 112–120.
- 443 33. Edel KH, Kudla J. Integration of calcium and ABA signaling. *Curr Opin Plant Biol*. 2016;33:  
444 83–91.
- 445 34. Chen Y, Zhou X, Chang S, Chu Z, Wang H, Han S, et al. Calcium-dependent protein kinase 21  
446 phosphorylates 14-3-3 proteins in response to ABA signaling and salt stress in rice. *Biochem*  
447 *Biophys Res Commun*. 2017;493: 1450–1456.
- 448 35. Midhat U, Ting MKY, Teresinski HJ, Snedden WA. The calmodulin-like protein, CML39, is  
449 involved in regulating seed development, germination, and fruit development in *Arabidopsis*.  
450 *Plant Mol Biol*. 2018;96: 375–392.
- 451 36. Wang Y, Li T, John SJ, Chen M, Chang J, Yang G, et al. A CBL-interacting protein kinase

- 452 TaCIPK27 confers drought tolerance and exogenous ABA sensitivity in transgenic *Arabidopsis*.  
453 *Plant Physiol Biochem.* 2018;123: 103–113.
- 454 37. Penfield S, Hall A. A role for multiple circadian clock genes in the response to signals that break  
455 seed dormancy in *Arabidopsis*. *Plant Cell.* 2009;21: 1722–1732.
- 456 38. Seung D, Risopatron JPM, Jones BJ, Mare J. Circadian clock-dependent gating in ABA  
457 signalling networks. *Protoplasma.* 2012;249: 445–457.
- 458 39. Lee HG, Mas P, Seo PJ. MYB96 shapes the circadian gating of ABA signaling in *Arabidopsis*.  
459 *Sci Rep.* 2016;6: 17754.
- 460 40. Footitt S, Ölçer-Footitt H, Hambidge AJ, Finch-Savage WE. A laboratory simulation of  
461 *Arabidopsis* seed dormancy cycling provides new insight into its regulation by clock genes and  
462 the dormancy-related genes *DOG1*, *MFT*, *CIPK23* and *PHYA*. *Plant Cell Environ.* 2017;40:  
463 1474–1486.
- 464 41. Adams S, Grundy J, Veflingstad SR, Dyer NP, Hannah MA, Ott S, et al. Circadian control of  
465 abscisic acid biosynthesis and signalling pathways revealed by genome-wide analysis of LHY  
466 binding targets. *New Phytol.* 2018;220: 893–907.
- 467 42. Xing H, Wang P, Cui X, Zhang C, Wang L, Liu X, et al. LNK1 and LNK2 recruitment to the  
468 evening element require morning expressed circadian related MYB-like transcription factors.  
469 *Plant Signal Behav.* 2015;10: e1010888.



- 470 43. Ritter A, Iñigo S, Fernández-Calco P, Heyndrickx KS, Dhondt S, Shi H, et al. The  
471 transcriptional repressor complex FRS7-FRS12 regulates flowering time and growth in  
472 Arabidopsis. *Nat Commun.* 2017;8: 15235.
- 473 44. Nusinow DA, Helfer A, Hamilton EE, King JJ, Imaizumi T, Schultz TF, et al. The ELF4-ELF3-  
474 LUX complex links the circadian clock to diurnal control of hypocotyl growth. *Nature.*  
475 2011;475: 398–402.
- 476 45. Gray JA, Shalit-kaneh A, Chu DN, Hsu PY, Harmer SL. The REVEILLE clock genes inhibit  
477 growth of juvenile and adult plants by control of cell size. *Plant Physiol.* 2017;173: 2308–2322.
- 478 46. Ledger S, Strayer C, Ashton F, Kay SA, Putterill J. Analysis of the function of two circadian-  
479 regulated CONSTANS-LIKE genes. *Plant J.* 2001;26: 15–22.
- 480 47. Dodd AN, Love J, Webb AAR. The plant clock shows its metal: circadian regulation of cytosolic  
481 free Ca<sup>2+</sup>. *Trends Plant Sci.* 2005;10: 15–21.
- 482 48. Dodd AN, Gardner MJ, Hotta CT, Hubbard KE, Dalchau N, Love J, et al. The Arabidopsis  
483 circadian clock incorporates a cADPR-based feedback loop. *Science.* 2007;318: 1789–1792.
- 484 49. Xu X, Hotta CT, Dodd AN, Love J, Sharrock R, Lee YW, et al. Distinct light and clock  
485 modulation of cytosolic free Ca<sup>2+</sup> oscillations and rhythmic *CHLOROPHYLL A/B BINDING*  
486 *PROTEIN2* promoter activity in Arabidopsis. *Plant Cell.* 2007;19: 3474–3490.
- 487 50. Martí Ruiz MC, Hubbard KE, Gardner MJ, Jung HJ, Aubry S, Hotta CT, et al. Circadian

- 488 oscillation of cytosolic free calcium regulate the Arabidopsis circadian clock. Nat Plants.  
489 2018;4: 690–698.
- 490 51. Rikiishi K, Maekawa M. Characterization of a novel wheat (*Triticum aestivum* L.) mutant with  
491 reduced seed dormancy. J Cereal Sci. 2010;51: 292–298.
- 492 52. Walker-Simmons M, Sesing J. Temperature effects on embryonic abscisic acid levels during  
493 development of wheat grain dormancy. J Plant Growth Regul. 1990;9: 51–56.
- 494 53. Nakamichi N, Kiba T, Kamioka M, Suzuki T, Yamashino T, Higashiyama T, et al.  
495 Transcriptional repressor PRR5 directly regulates clock-output pathways. Proc Natl Acad Sci  
496 USA. 2012;109: 17123–17128.
- 497 54. Kim W-Y, Ali Z, Park HJ, Cha J-Y, Perez-Hormaeche J, Quintero FJ, et al. Release of SOS2  
498 kinase from sequestration with GIGANTEA determines salt tolerance in *Arabidopsis*. Nat  
499 Commun. 2013;4: e1352.
- 500 55. Sanchez-Villarreal A, Shin J, Bujdoso N, Obata T, Neumann U, Du S-X, et al. *TIME FOR*  
501 *COFFEE* is an essential component in the maintenance of metabolic homeostasis in  
502 *Arabidopsis thaliana*. Plant J. 2013;76: 188–200.
- 503 56. Kolmos E, Chow BY, Pruneda-Paz JL, Kay SA. HsfB2b-mediated repression of *PRR7* directs  
504 abiotic stress responses of the circadian clock. Proc Natl Acad Sci USA. 2014;111: 16172–  
505 16177.

- 506 57. Fornara F, de Montaigu A, Sánchez-Villarreal A, Takahashi Y, Loren Ver, van Themaat E, et al.  
507 The GI-CDF module of *Arabidopsis* affects freezing tolerance and growth as well as flowering.  
508 Plant J. 2015;81: 695–706.
- 509 58. Miyazaki Y, Abe H, Takase T, Kobayashi M, Jiyosue T. Overexpression of *LOV KELCH*  
510 *PROTEIN 2* confers dehydration tolerance and is associated with enhanced expression of  
511 dehydration-inducible genes in *Arabidopsis thaliana*. Plant Cell Rep. 2015;34: 843–852.
- 512 59. Kong D, Ju C, Parihar A, Kim S, Cho D, Kwak JM. Arabidopsis glutamate homolog3.5  
513 modulates cytosolic Ca<sup>2+</sup> level to counteract effect of abscisic acid in seed germination. Plant  
514 Physiol. 2015;167: 1630–1642.
- 515 60. Zhou X, Hao H, Zhang Y, Bai Y, Zhu W, Qin Y, et al. SOS2-like protein kinase5, an SNF1-  
516 related protein kinase3-type protein kinase, is important for abscisic acid responses in  
517 Arabidopsis through phosphorylation of ABSCISIC ACID-INSENSITIVE5. Plant Physiol.  
518 2015;168: 659–676.
- 519 61. Sanyal SK, Kanwar P, Samtani H, Kaur K, Jha SK, Pandey GK. Alternative splicing of CIPK3  
520 results in distinct target selection to propagate ABA signaling in Arabidopsis. Front Plant Sci.  
521 2017;8: 1924.
- 522 62. Somyong S, Munkvold JD, Tanaka J, Benscher D, Sorrells ME. Comparative genetic analysis of  
523 a wheat seed dormancy QTL with rice and Brachypodium identifies candidate genes for ABA

524 perception and calcium signaling. *Funct Integr Genomics*. 2011;11: 479–490.

525 63. Somyong S, Ishikawa G, Munkvold JD, Tanaka J, Benscher D, Cho Y-G, et al. Fine mapping of

526 a preharvest sprouting QTL interval on chromosome 2B in white wheat. *Theor Appl Genet*.

527 2014;127: 1843–1855.

528

## 529 **Supporting information**

530 **S1 Table Down-regulated genes found on DAP30 in RSD32**

531 **S2 Table Down-regulated genes found on DAP40 in RSD32**

532 **S3 Table Up-regulated gens found on DAP40 in RSD32**

533

534

Norin61

Germination index (GI)

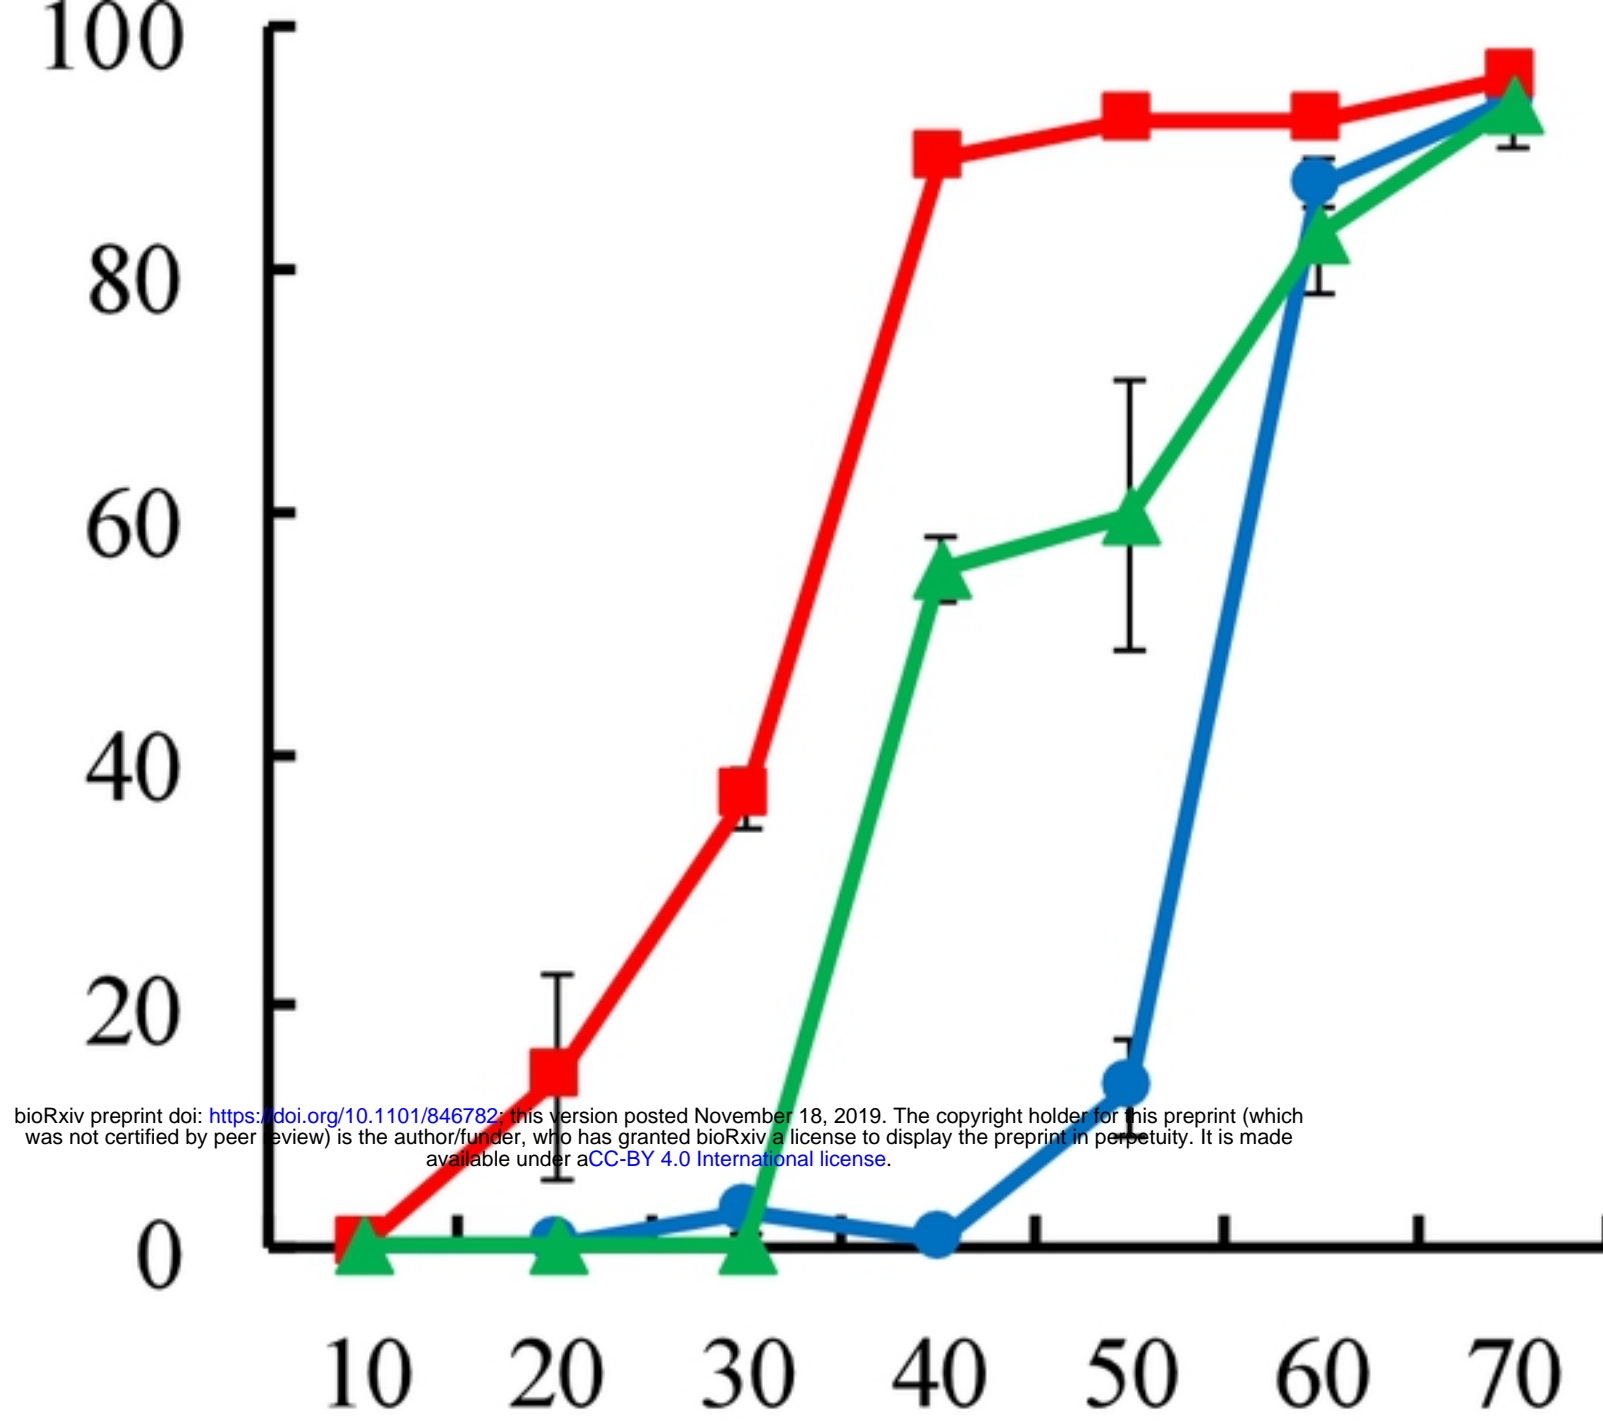

RSD32

Germination index (GI)

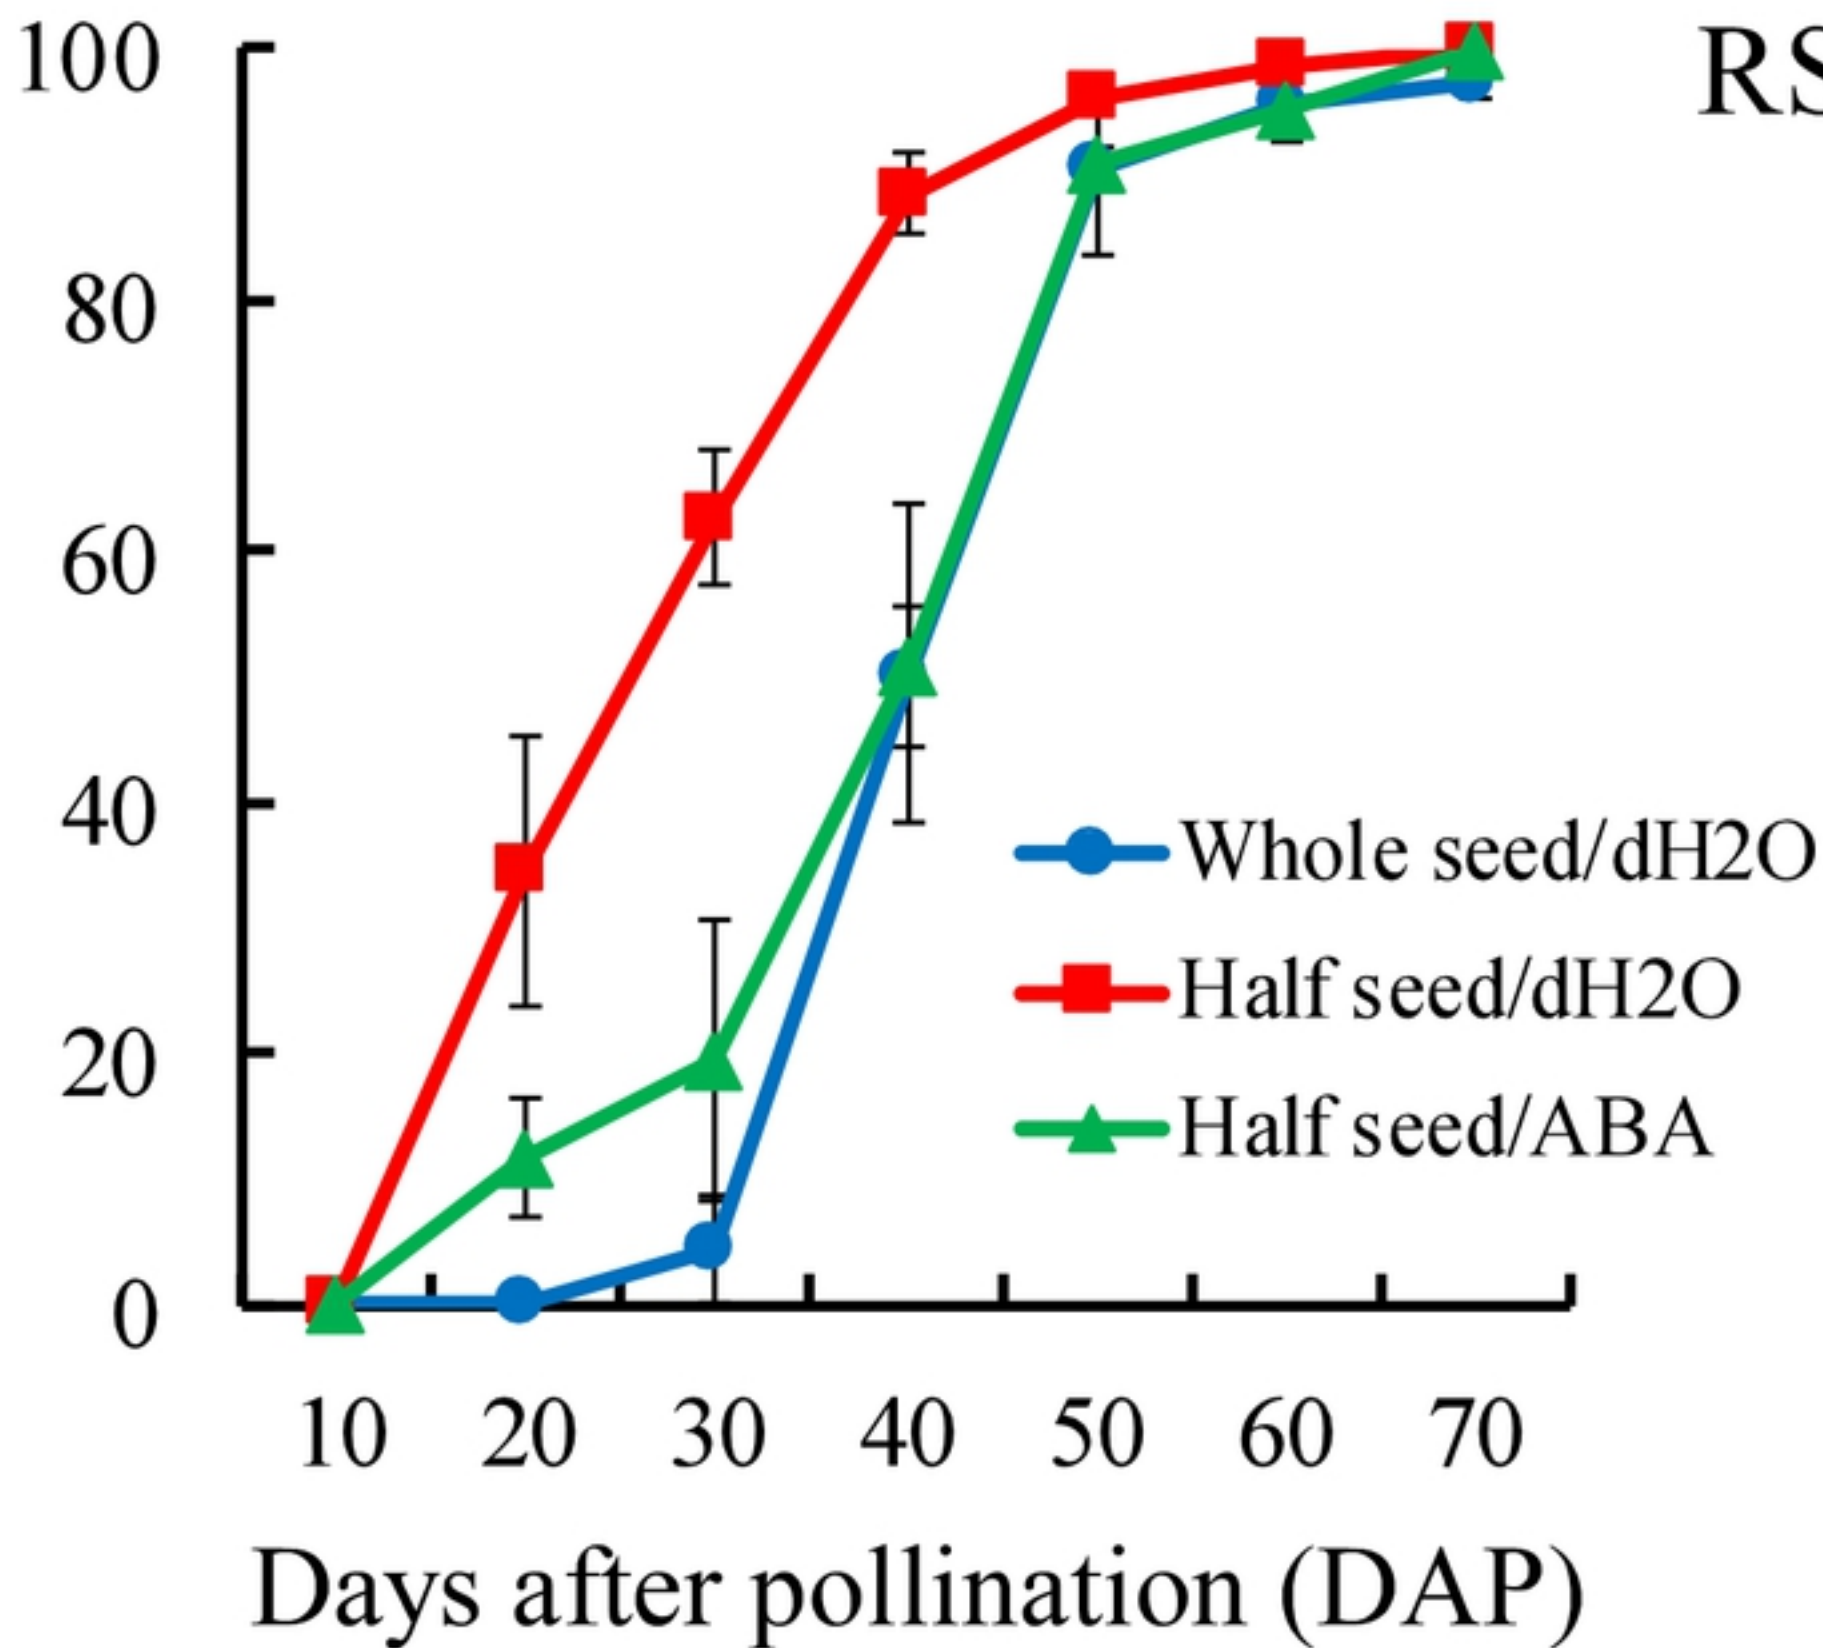

Days after pollination (DAP)

Fig1

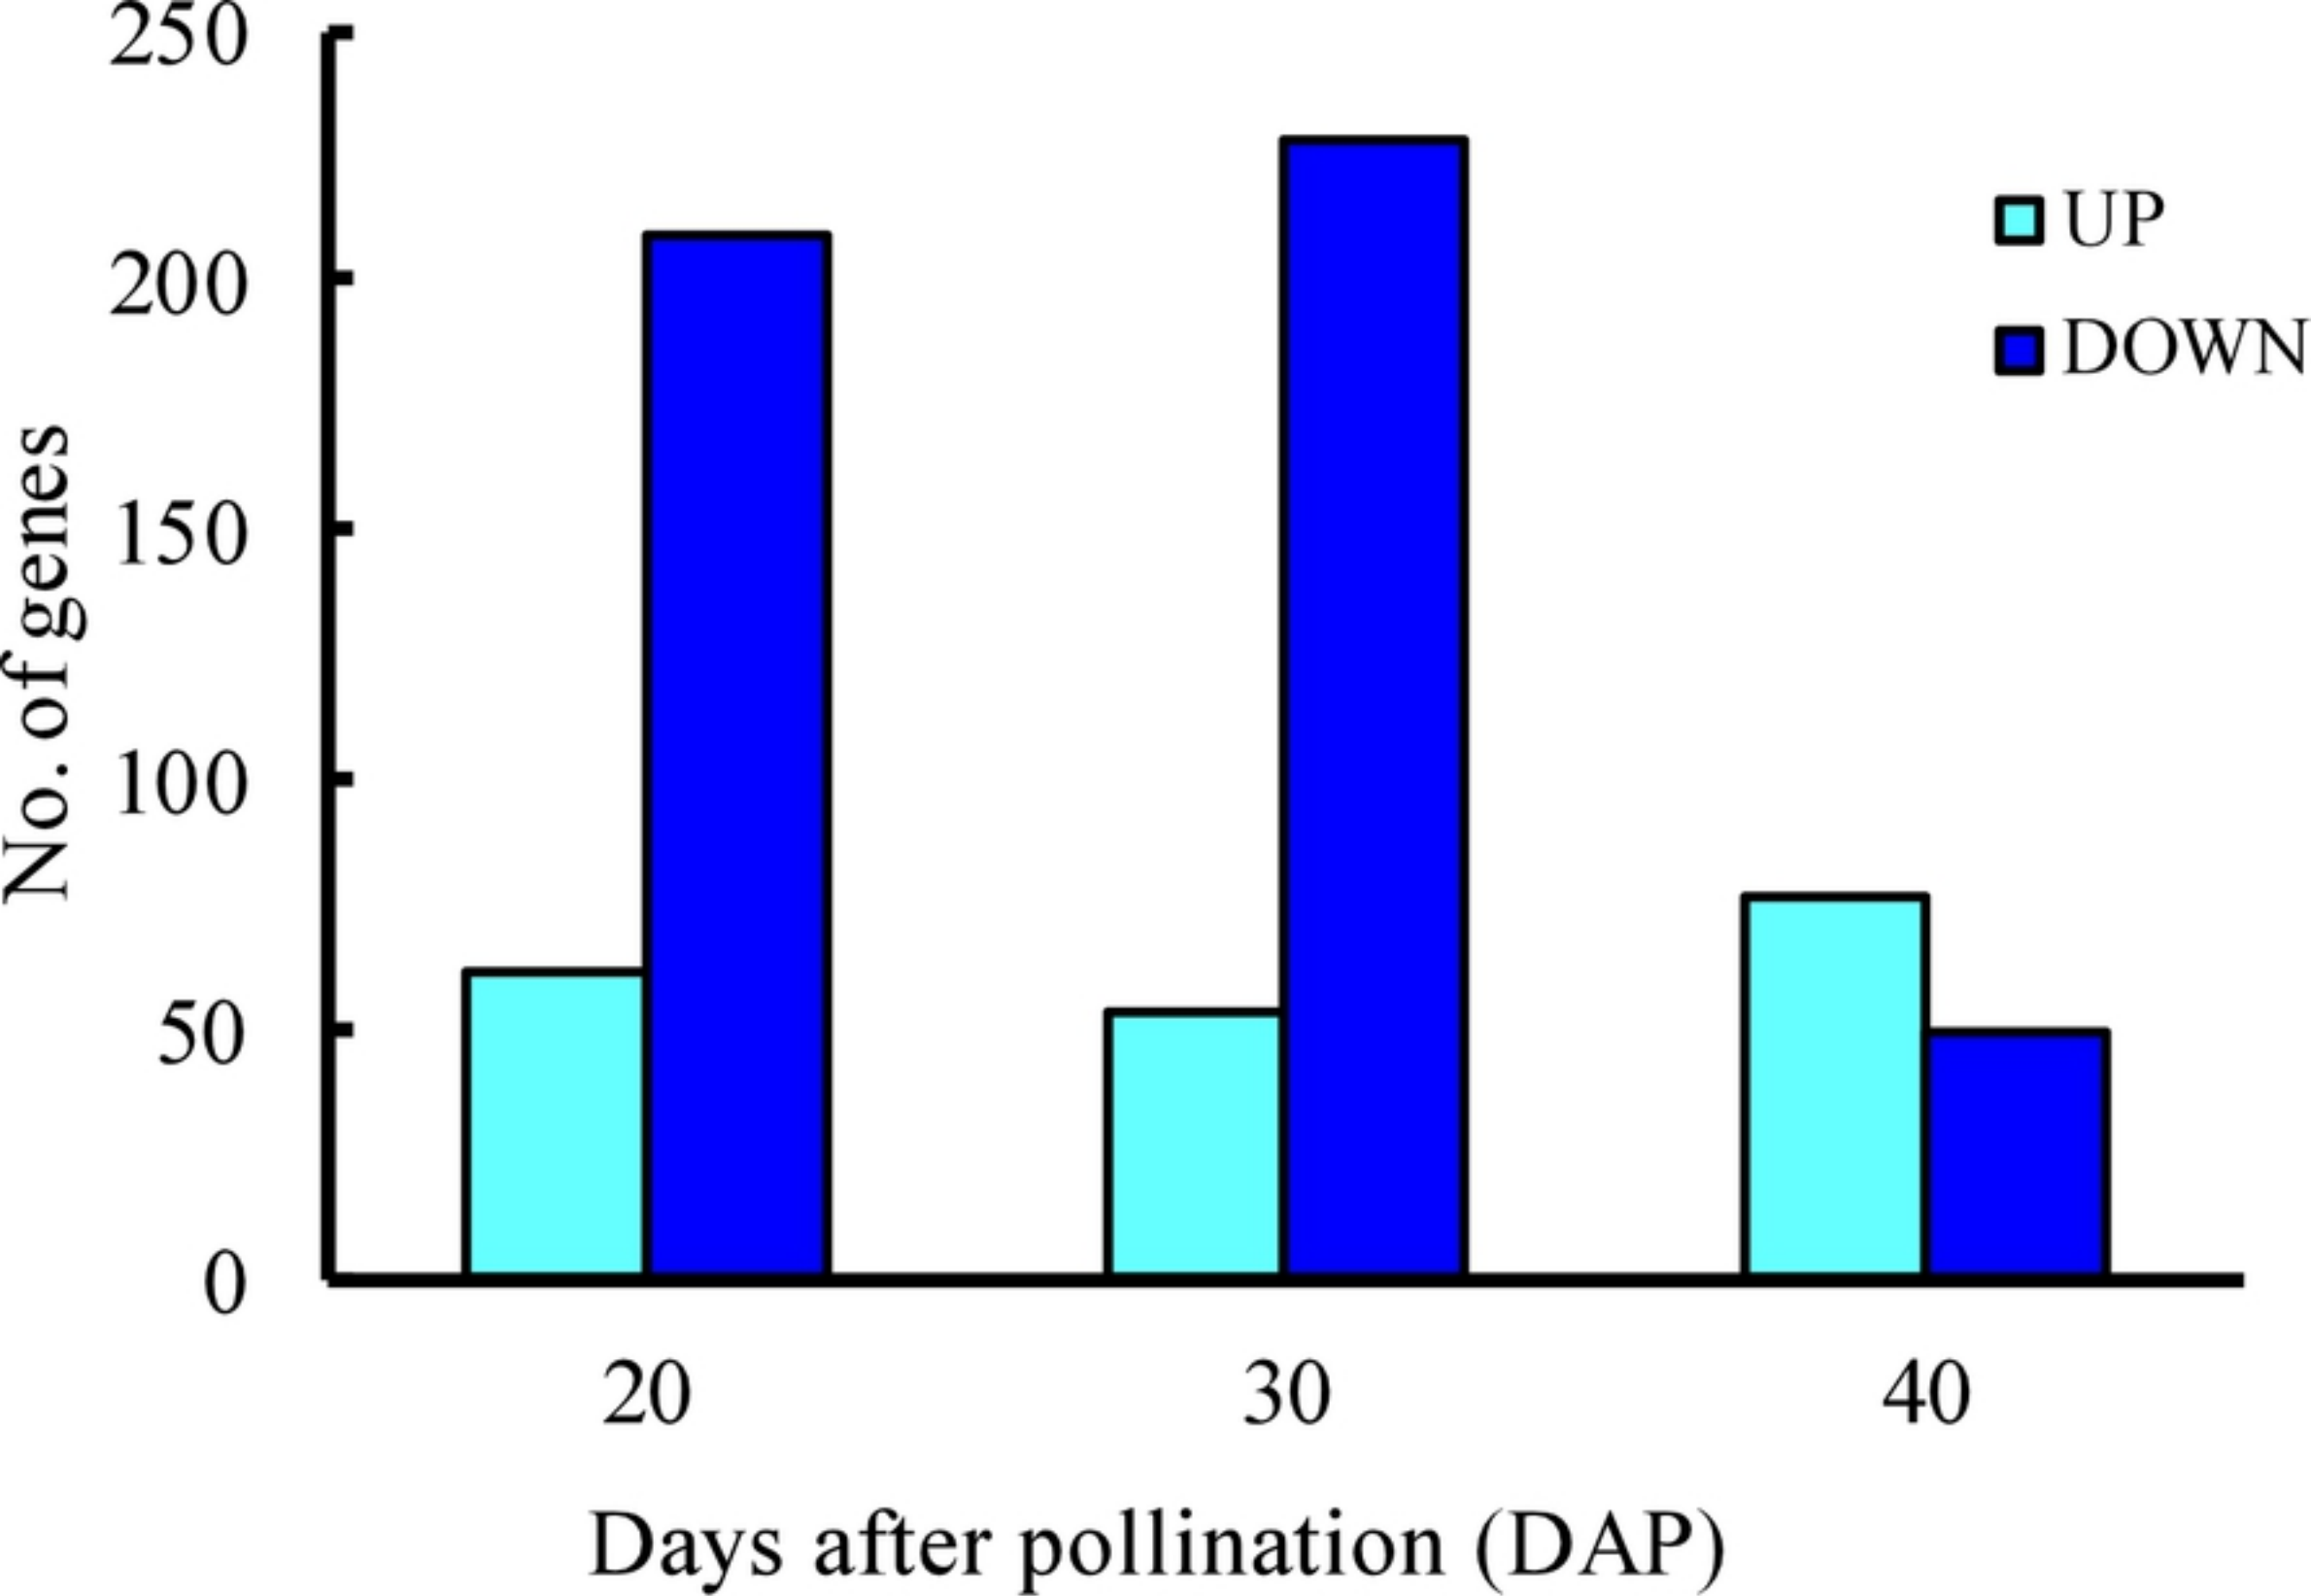

Fig2

**A****DAP20**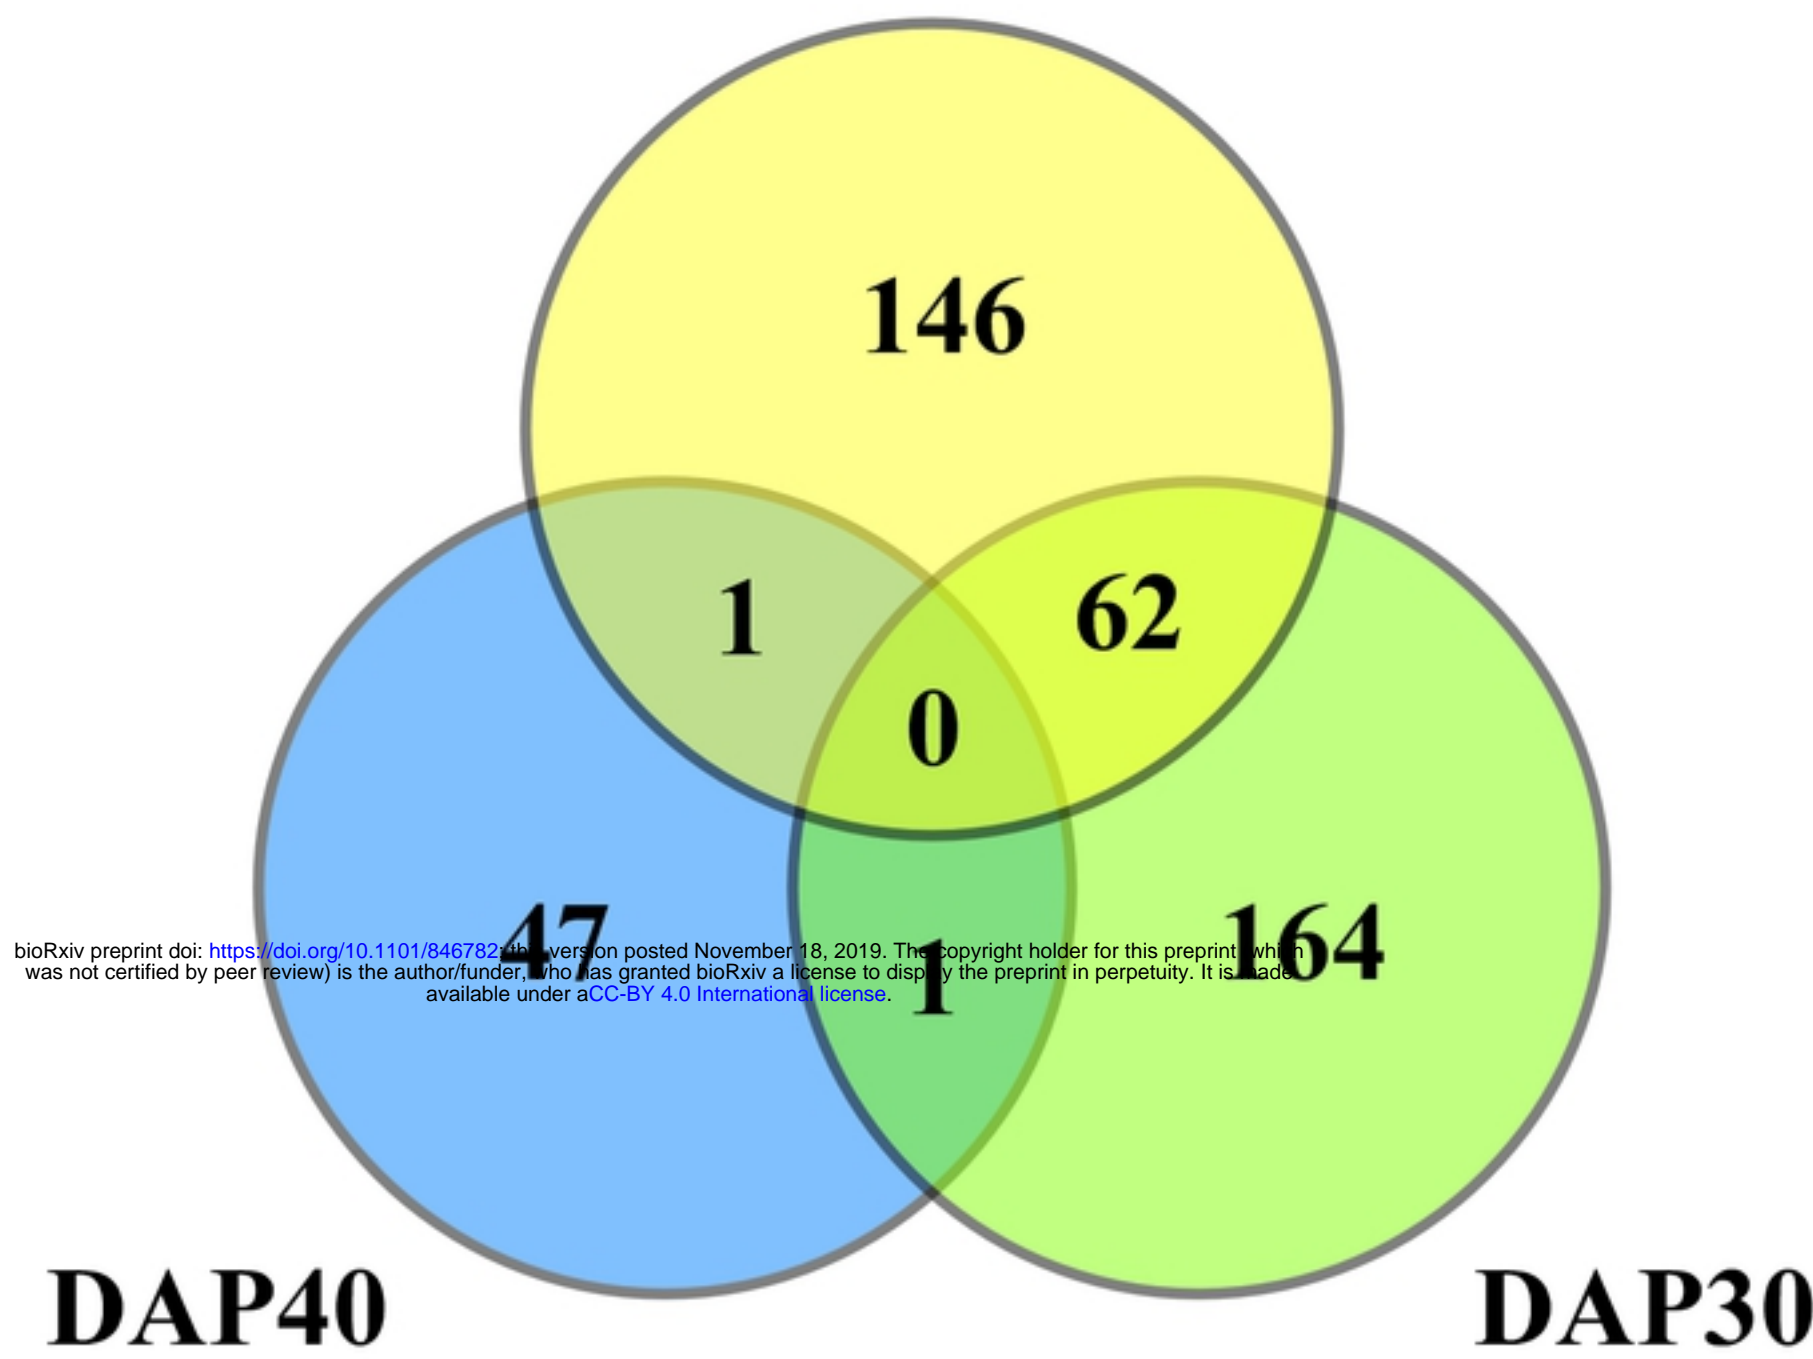**B****DAP20**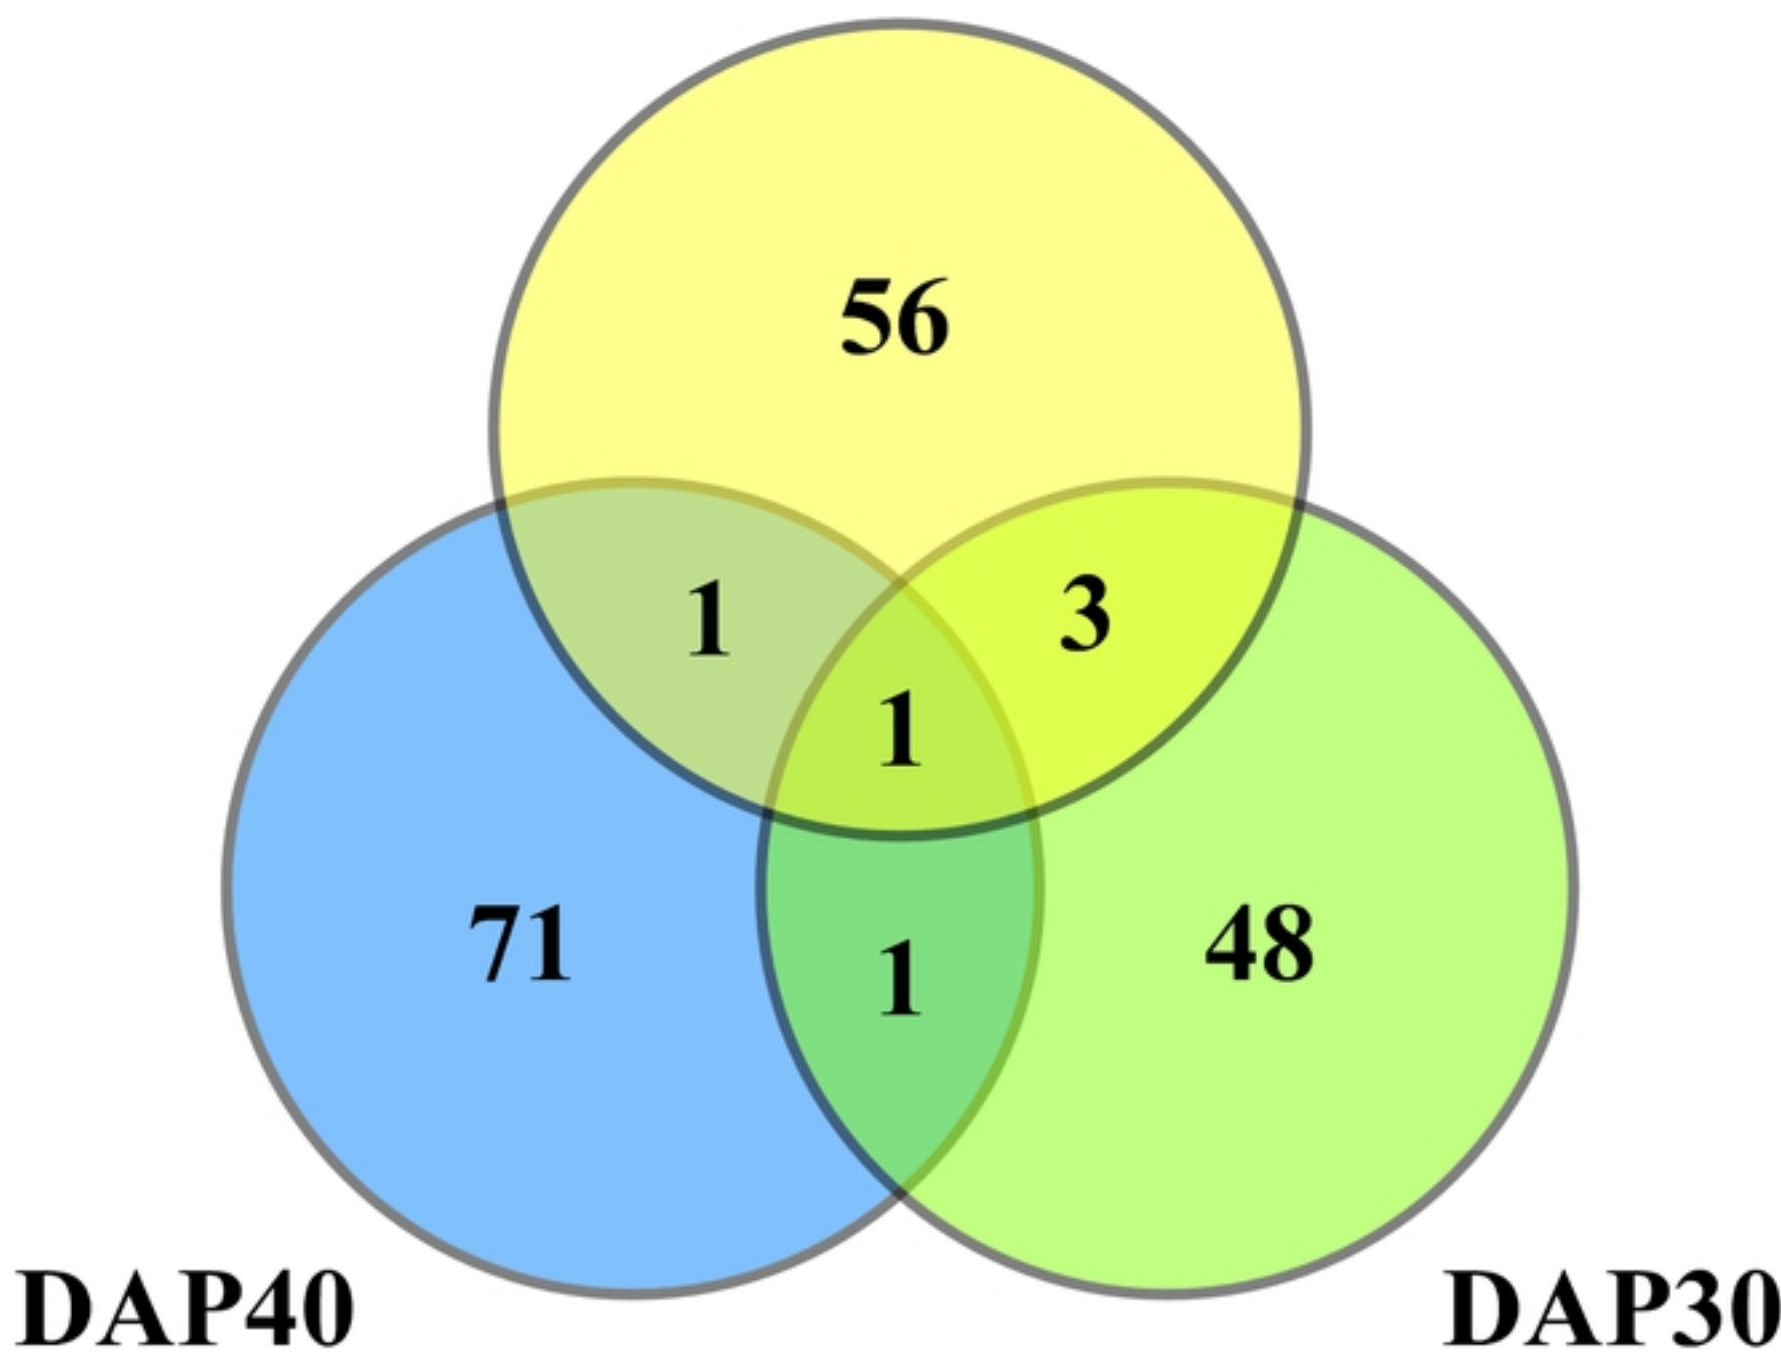

Fig3
